# Supplementary material for: A general approach to spirolactonized Si-rhodamines
Source: Royal Society of Chemistry journal article supplement (doi:10.1039/c4cc06178k), 2014-09-30
Supplement: c4cc06178k1.pdf [file c4cc06178k1.pdf]

## Supporting Information

### A general approach to spirolactonized Si-rhodamines

Baogang Wang,<sup>a</sup> Xiaoyun Chai,<sup>a</sup> Weiwei Zhu,<sup>ab</sup> Ting Wang<sup>\*a</sup> and Qiuye Wu<sup>\*a</sup>

<sup>a</sup>Department of Organic Chemistry, College of Pharmacy  
Second Military Medical University  
Guohe Road 325, Shanghai 200433 (China)  
E-mail: wangting1983927@gmail.com  
wuqy6439@sohu.com

<sup>b</sup>College of Pharmacy  
Yantai University  
Qingquan Road 32, Yantai, Shandong 264005 (China)

## **Table of Contents**

- 1. General Methods**
- 2. Synthesis of Intermediates**
- 3. Synthesis of SiRBs**
- 4.  $^1\text{H}$  NMR,  $^{13}\text{C}$  NMR and HRMS Spectra**
- 5. X-ray Crystallography**
- 6. Absorption and Fluorescence**
- 7. Fluorescence Imaging**
- 8. References**

## General Methods.

**Materials.** General chemicals were of the best grade available, supplied by Adamas-beta, Shanghai Chemical Reagent Co., Shanghai Shaoyuan Co. Ltd., Tokyo Chemical Industries (TCI), J&K chemical LTD. and Acros Organics. Unless otherwise stated, all commercial reagents were used without additional purification. All solvents were freshly distilled according to standard procedures prior to use.

**Apparatus.** All reactions were monitored by thin-layer chromatography (TLC) on gel F254 plates. Flash chromatography was carried out on silica gel (200-300 mesh; Qingdao Ocean Chemicals). The condensation reactions were performed in sealable pressure tubes (Beijing Synthware Glass) behind a blast shield. NMR spectra were recorded on a Bruker AC-300P spectrometer at 300 MHz for  $^1\text{H}$  NMR and at 75 MHz for  $^{13}\text{C}$  NMR or on a Bruker AC-600P spectrometer at 600 MHz for  $^1\text{H}$  NMR and at 150 MHz for  $^{13}\text{C}$  NMR.  $\Delta$  values are given in ppm relative to tetramethylsilane. Mass spectra (MS) were measured with an API-3000 MS spectrometer using electrospray ionization (ESI). High-resolution mass spectra (HRMS) were recorded on an Agilent Technologies 6538 UHD Accurate-Mass Q-TOF MS spectrometer using ESI. UV-visible spectra were obtained on a Agilent Cary 100 UV-vis spectrophotometer. Fluorescence spectroscopic studies were performed on a Hitachi F-7000. HPLC analysis was performed on an Diamonsil C18 (4.6  $\times$  250 mm) column (Dikma technologies) using an HPLC system composed of a pump (LC-20AD, Shimadzu) and a detector (SPD-M20A, Shimadzu).

**X-ray crystallography.** Single crystals of **SiRB** were obtained by slow evaporation of dichloromethane/*n*-hexane solution of **SiRB** at room temperature. The X-ray single crystal diffraction data for **SiRB** were collected on Bruker APEX DUO diffractometers with Mo K $\alpha$  radiation ( $\lambda = 0.71073$  Å) at  $113 \pm 2$  K in the  $\omega$ -2 $\theta$  scanning mode. The structures were solved by direct methods using the SHELXS-97 program<sup>1</sup> and refined by full-matrix least-squares techniques (SHELXL-97) on  $F^2$ .

Anisotropic thermal parameters were assigned to all non-hydrogen atoms. The organic hydrogen atoms were generated geometrically. CCDC-1011227 contains the supplementary crystallographic data for this paper. These data can be obtained free of charge from The Cambridge Crystallographic Data Center via [www.ccdc.cam.ac.uk/data\\_request/cif](http://www.ccdc.cam.ac.uk/data_request/cif).

**Absorption and fluorescence analysis.** Absorption spectra were obtained with 1.0-cm glass cells. Fluorescence emission spectra were obtained with a Xenon lamp and 1.0-cm quartz cells. The fluorescence intensity was measured at 600 nm for **SiRBs**. The excitation and emission slits were set to 5.0 and 5.0 nm, respectively. Relative fluorescence quantum efficiency was obtained by comparing the area under the emission spectrum of the test sample with that of a solution of Cresyl violet in EtOH, which has a quantum efficiency of 0.56<sup>2</sup>.

**Imaging of bEND3 and HepG2 Cells Incubated with SiRB.** bEND3 and HepG2 cells were cultured in culture media (DMEM supplemented with 10% fetal bovine serum, 50 unit/mL of penicillin, and 50  $\mu$ g/mL of streptomycin) in an atmosphere of 5% CO<sub>2</sub> and 95% air at 37 °C in a humidified incubator. For fluorescence imaging with **SiRB**, bEND3 and HepG2 cells were seeded in 35-mm glass-bottom culture dishes at a density of  $5.0 \times 10^4$  cells in culture media. After 24 h, the cells were incubated with 10  $\mu$ M **SiRB** in culture media for 40 minutes at 37°C. Then the solution of DAPI was added and incubated for another 20 min. Cells were washed three times with PBS (pH = 7.4) and observed under a confocal laser scanning microscope.

**Imaging of bEND3 and HepG2 Cells Incubated with Mito-SiRB and rhodamine 123.** bEND3 and HepG2 cells were cultured in culture media (DMEM supplemented with 10% fetal bovine serum, 50 unit/mL of penicillin, and 50  $\mu$ g/mL of streptomycin) in an atmosphere of 5% CO<sub>2</sub> and 95% air at 37 °C in a humidified incubator. For fluorescence imaging with **Mito-SiRB**, bEND3 and HepG2 cells were seeded in 35-mm glass-bottom culture dishes at a density of  $5.0 \times 10^4$  cells in culture media.

After 24h, the cells were incubated with 10  $\mu$ M **Mito-SiRB** in culture media for 40 minutes at 37°C. Then 1  $\mu$ M rhodamine 123 was added and incubated for another 20 min. Cells were washed three times with PBS (pH = 7.4) and observed under a confocal laser scanning microscope.

## Synthesis of Intermediates.

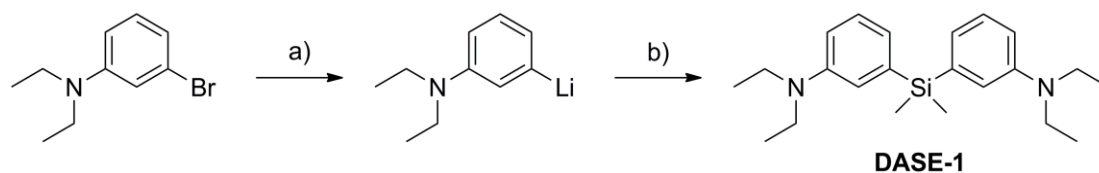

**Scheme S1.** Synthesis of **DASE-1**. Reaction conditions: a) diethyl ether, *n*-BuLi (2.4 M in *n*-hexane), 0 °C, 2 h; b) diethyl ether, dichlorodimethylsilane, 0 °C to RT, overnight.

**DASE-1**<sup>3</sup>. To a 250 mL well-dried flask flushed with argon, 3-bromo-N,N-diethylaniline (6.844 g, 30.0 mmol) and diethyl ether (60 mL) were added. The solution was cooled to 0 °C, *n*-BuLi (2.4 M in *n*-hexane, 13.1 mL, 31.5 mmol) was added and the reaction mixture was stirred at 0 °C for 2 h. Dichlorodimethylsilane (2.2 mL, 18.0 mmol) dissolved in diethyl ether (10 mL) was added dropwise, and the reaction mixture was slowly warmed to room temperature, then stirred overnight. The reaction was quenched with water (50 mL) and extracted with diethyl ether (50 mL × 3). The organic layers were combined, washed with brine and dried over anhydrous Na<sub>2</sub>SO<sub>4</sub>. After filtration and removal of the solvent under reduced pressure, the residue was purified by column chromatography on silica gel (petroleum ether : ethyl acetate = 80 : 1) to afford **DASE-1** (4.362 g, 82% yield) as light yellow oil. <sup>1</sup>H NMR (300 MHz, CDCl<sub>3</sub>) δ 0.64 (s, 6H), 1.23 (t, 12H, *J* = 7.2 Hz), 3.43 (q, 8H, *J* = 7.2 Hz), 6.79-7.35 (m, 8H); <sup>13</sup>C NMR (75 MHz, CDCl<sub>3</sub>) δ -2.13, 12.67, 44.45, 112.79, 117.75, 121.47, 128.76, 139.11, 147.10; MS (ESI) calcd. for C<sub>22</sub>H<sub>34</sub>N<sub>2</sub>Si [M+H]<sup>+</sup>: 355.26, found: 355.32.

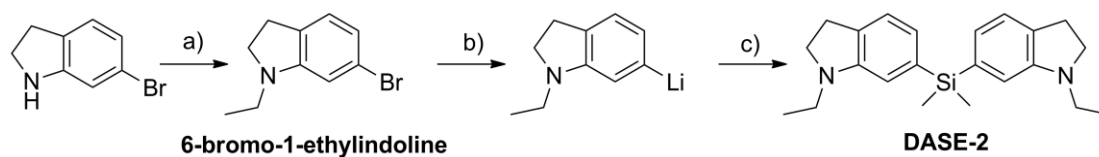

**Scheme S2.** Synthesis of **DASE-2**. Reaction conditions: a) THF, NaH (60%

dispersion in mineral oil), iodoethane, 0 °C to 50 °C, 12 h; b) diethyl ether, *n*-BuLi (1.6 M in *n*-hexane), 0 °C, 2 h; c) diethyl ether, dichlorodimethylsilane, 0 °C to RT, overnight.

**6-bromo-1-ethylindoline.** To a solution of 6-bromoindoline hydrochloride (5.863 g, 25.0 mmol) in THF (50 mL) was slowly added NaH (2.00 g, 60% dispersion in mineral oil, 50.0 mmol) at 0 °C. The mixture was stirred for 1 h at the same temperature. After iodoethane (4.677 g, 30 mmol) was added, the reaction mixture was stirred at room temperature for 6 h and stirred at 50 °C for another 6 h. The reaction was quenched with water and extracted with ethyl acetate (30 mL × 3). The organic layers were combined, washed with brine and dried over anhydrous Na<sub>2</sub>SO<sub>4</sub>. After filtration and removal of the solvent under reduced pressure, the residue was purified by column chromatography on silica gel (petroleum ether) to give **6-bromo-1-ethylindoline** (5.201 g, 92% yield) as light yellow oil. <sup>1</sup>H NMR (300 MHz, CDCl<sub>3</sub>) δ 1.16 (t, 6H, *J* = 7.2 Hz), 2.88 (t, 2H, *J* = 8.1 Hz), 3.10 (q, 2H, *J* = 7.2 Hz), 3.36 (t, 2H, *J* = 8.4 Hz), 6.53-6.89 (m, 3H); <sup>13</sup>C NMR (75 MHz, CDCl<sub>3</sub>) δ 11.72, 27.99, 42.57, 52.30, 109.86, 119.71, 121.04, 125.34, 129.26, 153.73; MS (ESI) calcd. for C<sub>10</sub>H<sub>12</sub>BrN [M+H]<sup>+</sup>: 226.02, found: 226.14.

**DASE-2.** To a 250 mL well-dried flask flushed with argon, **6-bromo-1-ethylindoline** (4.070 g, 18.0 mmol) and diethyl ether (50 mL) were added. After the solution was cooled to 0 °C, *n*-BuLi (1.6 M in *n*-hexane, 11.8 mL, 18.9 mmol) was added and the reaction mixture was stirred at 0 °C for 2 h. Dichlorodimethylsilane (1.3 mL, 10.8 mmol) dissolved in diethyl ether (10 mL) was added dropwise and the reaction mixture was slowly warmed to room temperature, then stirred overnight. The reaction was quenched with water (50 mL) and extracted with diethyl ether (30 mL × 3). The organic layers were combined, washed with brine and dried over anhydrous Na<sub>2</sub>SO<sub>4</sub>. After filtration and removal of the solvent under reduced pressure, the residue was purified by column chromatography on silica gel (petroleum ether : ethyl acetate = 40 : 1) to give **DASE-2** (2.423 g, 77% yield) as light yellow oil. <sup>1</sup>H NMR (300 MHz,

CDCl<sub>3</sub>)  $\delta$  0.49 (s, 6H), 1.16 (t, 6H,  $J = 7.2$  Hz), 2.94 (t, 4H,  $J = 8.1$  Hz), 3.12 (q, 4H,  $J = 7.2$  Hz), 3.30 (t, 4H,  $J = 8.4$  Hz), 6.65-7.08 (m, 6H); <sup>13</sup>C NMR (75 MHz, CDCl<sub>3</sub>)  $\delta$  -1.80, 12.09, 28.57, 43.17, 52.20, 112.39, 124.00, 124.07, 131.64, 137.17, 151.80; MS (ESI) calcd. for C<sub>22</sub>H<sub>30</sub>N<sub>2</sub>Si [M+H]<sup>+</sup>: 351.23, found: 351.26.

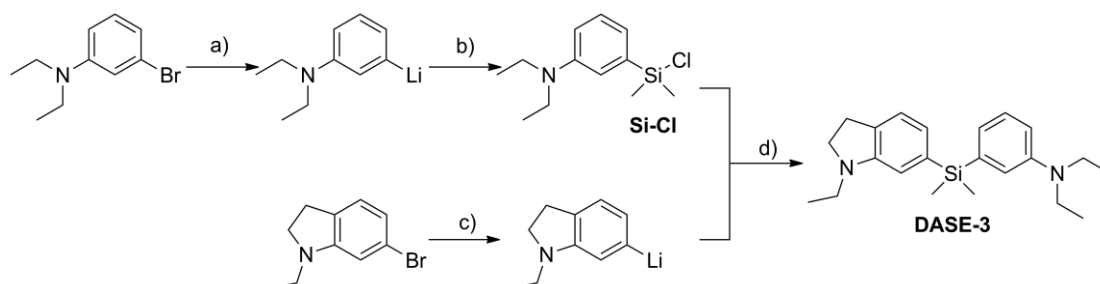

**Scheme S3.** Synthesis of **DASE-3**. Reaction conditions: a) diethyl ether, *n*-BuLi (1.6 M in *n*-hexane), 0 °C, 2 h; b) diethyl ether, dichlorodimethylsilane, 0 °C to RT, 2 h; c) diethyl ether, *n*-BuLi (1.6 M in *n*-hexane), 0 °C, 2 h; d) diethyl ether, **Si-Cl**, 0 °C to RT, overnight.

**Si-Cl.** To a 100 mL well-dried flask flushed with argon, 3-bromo-*N,N*-diethylaniline (2.738 g, 12.0 mmol) and diethyl ether (10 mL) were added. After the solution was cooled to 0 °C, *n*-BuLi (1.6 M in *n*-hexane, 7.9 mL, 12.0 mmol) was added. After the reaction mixture was stirred at the same temperature for 2 h, the resulting solution was transferred via cannula to a solution of dichlorodimethylsilane (7.3 mL, 60.0 mmol) in diethyl ether (10 mL) at 0 °C. The reaction was slowly warmed to room temperature and stirred for another 2 h. The solvent and the redundant dichlorodimethylsilane were removed under reduced pressure to give the crude **Si-Cl**, which was used without further purification. Compound **Si-Cl** is sensitive to water and is sealed in the flask.

**DASE-3**<sup>4</sup>. To a 50 mL well-dried flask flushed with argon, **6-bromo-1-ethylindoline** (1.357 g, 6.0 mmol) and diethyl ether (10 mL) were added. After the solution was cooled to 0 °C, *n*-BuLi (1.6 M in *n*-hexane, 4.0 mL, 6.4 mmol) was added and the reaction mixture was stirred at 0 °C for 2 h. This resulting mixture was transferred via cannula into the solution of compound **Si-Cl** in diethyl ether (10 mL) at 0 °C. The



reaction mixture was slowly warmed to room temperature and stirred overnight. The reaction was quenched with water (30 mL) and extracted with diethyl ether (20 mL  $\times$  3). After filtration and removal of the solvent under reduced pressure, the residue was purified by column chromatography on silica gel (petroleum ether : ethyl acetate = 40 : 1 ) to give **DASE-3** (1.116 g, 53% yield) as light yellow oil.  $^1\text{H}$  NMR (300 MHz,  $\text{CDCl}_3$ )  $\delta$  0.50 (s, 6H), 1.12 (t, 6H,  $J = 7.2$  Hz), 1.16 (t, 3H,  $J = 7.2$  Hz), 2.93 (t, 2H,  $J = 8.1$  Hz), 3.11 (q, 2H,  $J = 7.2$  Hz), 3.30 (t, 2H,  $J = 8.1$  Hz), 3.32 (q, 4H,  $J = 7.2$  Hz), 6.70-7.23 (m, 7H);  $^{13}\text{C}$  NMR (75 MHz,  $\text{CDCl}_3$ )  $\delta$  -2.01, 12.13, 12.60, 28.56, 43.17, 44.38, 52.22, 112.34, 112.73, 117.72, 121.45, 123.99, 124.02, 128.68, 131.64, 137.00, 139.20, 147.05, 151.84; MS (ESI) calcd. for  $\text{C}_{22}\text{H}_{32}\text{N}_2\text{Si}$   $[\text{M}+\text{H}]^+$ : 353.60, found: 353.49.

**General procedure for synthesis of substituted 2-formylbenzoic acid.**

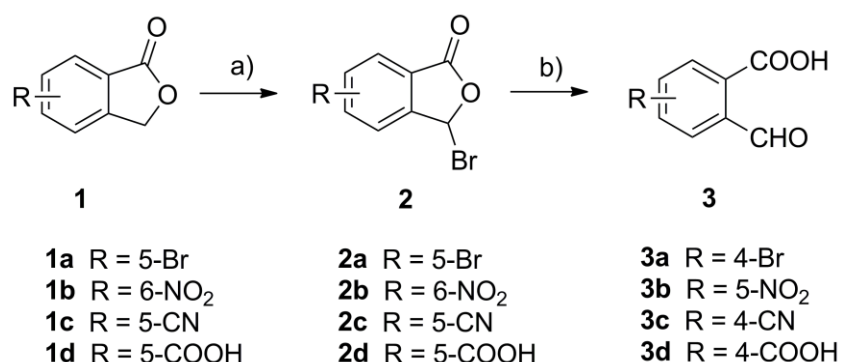

**Scheme S4.** Synthesis of compounds **3**. Reaction conditions: a) NBS, AIBN, 1,2-dichloroethane, reflux; b)  $\text{H}_2\text{O}$ , reflux.

**3a-3d**<sup>5</sup>. compounds **3a-3d** were prepared following reported method with some modification. To a 250 mL round bottom flask were added substituted phthalide (**1**) (20.0 mmol, 1.0 equiv.), bromosuccinimide (22.0 mmol, 1.1 equiv.), azobisisobutyronitrile (2.0 mmol, 0.1 equiv.) and 1,2-dichloroethane (100 mL). The reaction mixture was stirred and refluxed until the reaction was complete and then kept at  $-5\text{ }^\circ\text{C}$  for 2 h. After filtration and removal of the solvent under reduced pressure, water (50 mL) was added and the resulting mixture refluxed for 2 h. The

reaction mixture was then cooled to room temperature and kept at 4 °C overnight. The precipitate was collected and dried in *vacuo* to give the desired compounds.

**3a.** White solid (4.524 g, 99% yield); <sup>1</sup>H NMR (300 MHz, DMSO-*d*<sub>6</sub>) δ 6.70-7.90 (m, 3H), 7.95 (s, 1H).

**3b.** Light yellow solid (3.284 g, 84% yield); <sup>1</sup>H NMR (300 MHz, DMSO-*d*<sub>6</sub>) δ 7.00-8.64 (m, 3H), 8.53 (s, 1H).

**3c.** White solid (2.646 g, 76% yield); <sup>1</sup>H NMR (300 MHz, DMSO-*d*<sub>6</sub>) δ 6.92-8.17 (m, 3H), 8.28 (s, 1H).

**3d.** White solid (1.012 g, 26% yield); <sup>1</sup>H NMR (300 MHz, DMSO-*d*<sub>6</sub>) 6.73-8.19 (m, 3H), 8.13 (s, 1H), 13.62 (s, 1H). The relatively low yield is attributed to the poor solubility of the starting material **2d** in 1,2-dichloroethane. Insoluble compound **2d** was recovered by filtration.

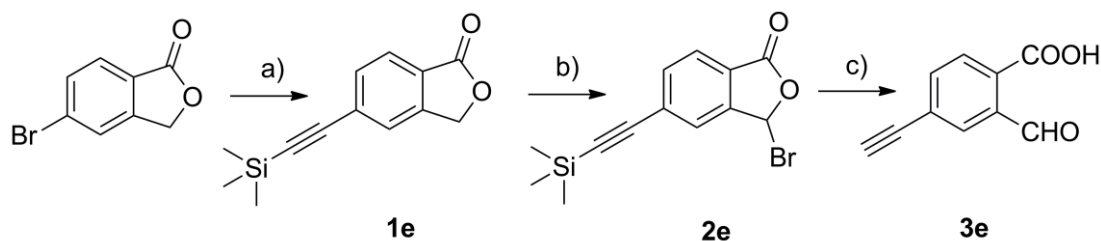

**Scheme S5.** Synthesis of compound **3e**. Reaction conditions: a) ethynyltrimethylsilane, CuI, Pd(PPh<sub>3</sub>)<sub>4</sub>, TEA, DMF, 65 °C, 24 h; b) NBS, AIBN, 1,2-dichloroethane, reflux, 12 h; c) K<sub>2</sub>CO<sub>3</sub>, CH<sub>3</sub>OH, 25 °C, 4 h.

**1e.** To a 100 mL well-dried flask flushed with argon, 5-bromoisobenzofuran-1(3H)-one (10.652 g, 50.0 mmol), ethynyltrimethylsilane (19.644 g, 200.0 mol), copper(I) iodide (2.857 g, 15.0 mol), Pd(PPh<sub>3</sub>)<sub>4</sub> (2.889 g, 2.5 mmol), triethylamine (6.5 mL, 25 mmol) and DMF (25.0 mL) were added. The reaction mixture was stirred at 65 °C for 24 h, then poured into iced water (200 mL)

and extracted with ethyl acetate (100 ml  $\times$  3). The combined organic layer was washed with brine and dried over anhydrous  $\text{Na}_2\text{SO}_4$ . After filtration and removal of the solvent under reduced pressure, the residue was purified by column chromatography on silica gel (hexane : EtOAc = 10 : 1) to give compound **1e** (9.444 g, 82% yield) as white solid.  $^1\text{H}$  NMR (300 MHz,  $\text{CDCl}_3$ )  $\delta$  0.29 (s, 9H), 5.31 (s, 2H), 7.59-7.85 (m, 3H);  $^{13}\text{C}$  NMR (75 MHz,  $\text{CDCl}_3$ )  $\delta$  -0.25, 69.31, 99.06, 103.38, 125.19, 25.39, 125.58, 129.20, 132.80, 146.41, 170.38.

**2e.** To a 500 mL round bottom flask were added 5-((trimethylsilyl)ethynyl)isobenzofuran-1(3H)-one (6.910 g, 30.0 mmol), bromosuccinimide (5.874 g, 33.0 mmol), azobisisobutyronitrile (0.492 g, 3.0 mmol) and 1,2-dichloroethane (150 mL). The reaction mixture was stirred and refluxed for 12 h and then kept at  $-5\text{ }^\circ\text{C}$  for 2 h. After filtration and removal of the solvent under reduced pressure, the residue was purified by column chromatography on silica gel (hexane : EtOAc = 15 : 1) to give compound **2e** (4.638 g, 50% yield) as white solid and the recovered material **1e** (2.584 g, 37%).  $^1\text{H}$  NMR (300 MHz,  $\text{CDCl}_3$ )  $\delta$  0.30 (s, 9H), 7.38 (s, 1H), 7.67-7.89 (m, 3H);  $^{13}\text{C}$  NMR (75 MHz,  $\text{CDCl}_3$ )  $\delta$  -0.31, 73.96, 100.56, 102.72, 123.25, 125.74, 126.73, 130.56, 134.46, 148.84, 166.60.

**3e.** To a solution of **2e** (1.855 g, 6.0 mmol) in methanol (20 mL) was added anhydrous  $\text{K}_2\text{CO}_3$  (2.488 g, 18 mmol). The mixture was stirred at  $25\text{ }^\circ\text{C}$  for 4 h. The solvent was removed under reduced pressure and water (50 mL) was added. The clear solution was extracted with dichloromethane (30 mL  $\times$  3) and acidified by 2 M hydrochloric acid. The precipitate was collected and washed 3 times by water and dried to give compound **3e** (951 mg, 91% yield) as a light yellow solid.  $^1\text{H}$  NMR (300 MHz,  $\text{DMSO}-d_6$ ):  $\delta$  4.58 (s, 1H), 6.65-7.85 (m, 3H), 8.26 (s, 1H).

## Synthesis of SiRBs.

**Tables S1.** Optimization of the reaction conditions

| DASE-1 $\xrightarrow{\text{2-formylbenzoic acid}}$ SiRB |                   |                                |       |      |                    |
|---------------------------------------------------------|-------------------|--------------------------------|-------|------|--------------------|
| Entry                                                   | Lewis acid        | Equiv. of 2-formylbenzoic acid | Temp. | Time | yield <sup>a</sup> |
| 1                                                       | -                 | 5                              | 140   | 8    | 40                 |
| 2                                                       | NbCl <sub>5</sub> | 5                              | 140   | 8    | 31                 |
| 3                                                       | ZnCl <sub>2</sub> | 5                              | 140   | 8    | 32                 |
| 4                                                       | ZnBr <sub>2</sub> | 5                              | 140   | 8    | 32                 |
| 5                                                       | AlCl <sub>3</sub> | 5                              | 140   | 8    | 27                 |
| 6                                                       | FeCl <sub>3</sub> | 5                              | 140   | 8    | 39                 |
| 7                                                       | FeCl <sub>2</sub> | 5                              | 140   | 8    | 40                 |
| 8                                                       | CuBr              | 5                              | 140   | 8    | 41                 |
| 9                                                       | CuI               | 5                              | 140   | 8    | 39                 |
| 10                                                      | CuCl <sub>2</sub> | 5                              | 140   | 8    | 43                 |
| 11                                                      | CuBr <sub>2</sub> | 5                              | 140   | 8    | 50                 |
| 12                                                      | CuBr <sub>2</sub> | 3                              | 140   | 8    | 44                 |
| 13                                                      | CuBr <sub>2</sub> | 2                              | 140   | 8    | 15                 |
| 14                                                      | CuBr <sub>2</sub> | 1                              | 140   | 8    | 2                  |
| 15                                                      | CuBr <sub>2</sub> | 5                              | 100   | 8    | 10                 |
| 16                                                      | CuBr <sub>2</sub> | 5                              | 120   | 8    | 40                 |
| 17                                                      | CuBr <sub>2</sub> | 5                              | 160   | 8    | 17                 |
| 18                                                      | CuBr <sub>2</sub> | 5                              | 140   | 1    | 37                 |
| 19                                                      | CuBr <sub>2</sub> | 5                              | 140   | 2    | 48                 |
| 20                                                      | CuBr <sub>2</sub> | 5                              | 140   | 5    | 54                 |

<sup>a</sup> Determined by HPLC. Elution was done with a eluent (85% MeCN; flow rate = 1.0 mL/min). Detection wavelength was 265 nm.

### General procedure for synthesis of R-SiRBs.

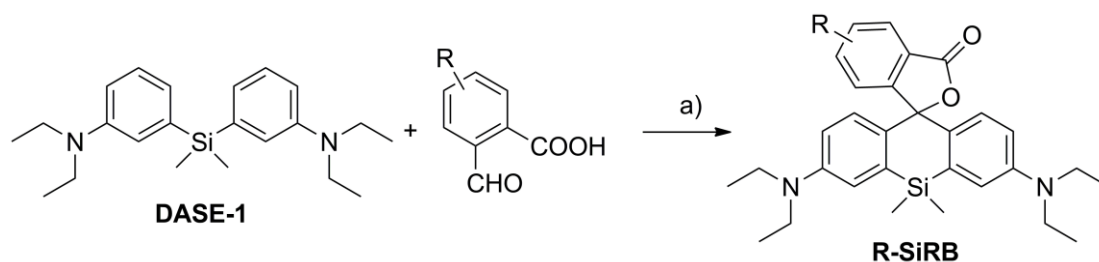

**Scheme S6.** Synthesis of **R-SiRBs**. Reaction conditions: a) CuBr<sub>2</sub>, sealed tube, 140 °C, 3-8 h.

**R-SiRBs.** To a 15 mL sealable pressure tube charged with a magnetic stir bar were added the intermediate **DASE-1** (106 mg, 0.3 mmol, 1.0 equiv.), substituted 2-formylbenzoic acid (**3a-3e**, 1.5 mmol, 5.0 equiv.) and copper(II) bromide (7 mg, 0.03 mmol, 0.1 equiv.). The tube was sealed tightly and heated at 140 °C for 3-8 h.

**[Caution:** To avoid potential danger, all the reaction tubes were placed behind a blast shield.] After cooling to room temperature, the reaction mixture was dissolved in 5 mL dichloromethane and purified by column chromatography on silica gel to give the desired compounds.

**SiRB.** 2-formylbenzoic acid (225 mg) was added and the reaction mixture was stirred for 5 h. The mixture was purified by column chromatography on silica gel (petroleum ether : ethyl acetate : triethylamine = 80 : 1 : 1 ) to give **SiRB** (75 mg, 52% yield) as a white solid. In scalable synthesis, the reaction mixture was dissolved in dichloromethane and washed with 2M NaOH aqueous solution to remove unreacted 2-formylbenzoic acid and other acid side products. The organic layer was further washed with brine and dried over anhydrous Na<sub>2</sub>SO<sub>4</sub>. After filtration and removal of the solvent under reduced pressure, the residue was purified by column chromatography on silica gel. And the product was further recrystallized from dichloromethane/petroleum ether to give **SiRB** as colorless needle crystals. <sup>1</sup>H NMR (300 MHz, CDCl<sub>3</sub>) δ 0.64 (s, 3H), 0.66 (s, 3H), 1.18 (t, 12H, *J* = 7.2 Hz), 3.39 (q, 8H, *J* = 7.2 Hz), 6.50-8.01 (m, 10H); <sup>13</sup>C NMR (75 MHz, CDCl<sub>3</sub>) δ -1.78, 0.44, 12.55,

44.28, 92.30, 112.45, 115.94, 124.86, 125.58, 127.48, 128.46, 128.65, 130.79, 133.50, 137.30, 146.58, 154.15, 170.63. HRMS (ESI) calcd. for  $C_{30}H_{36}N_2O_2Si$   $[M+H]^+$ : 485.2619, found: 485.2623.

**Br-SiRB.** Compound **3a** (344 mg) was added and the reaction mixture was stirred for 8 h. The mixture was purified by column chromatography on silica gel (petroleum ether : ethyl acetate : triethylamine = 80 : 1 : 1) to give **Br-SiRB** (67 mg, 40% yield) as a white solid.  $^1H$  NMR (300 MHz,  $CDCl_3$ )  $\delta$  0.59 (s, 3H), 0.63 (s, 3H), 1.17 (t, 12H,  $J = 7.2$  Hz), 3.37 (q, 8H,  $J = 7.2$  Hz), 6.51-7.83 (m, 9H);  $^{13}C$  NMR (75 MHz,  $CDCl_3$ )  $\delta$  -1.36, 0.26, 12.58, 44.30, 91.75, 112.78, 115.82, 125.93, 126.80, 127.79, 128.49, 128.94, 129.87, 132.20, 136.84, 146.67, 156.71, 169.95. HRMS (ESI) calcd. for  $C_{30}H_{35}BrN_2O_4Si$   $[M+H]^+$ : 563.1724, found: 563.1740, 565.1725.

**O<sub>2</sub>N-SiRB.** Compound **3b** (293 mg) was added and the reaction mixture was stirred for 3 h. The mixture was purified by column chromatography on silica gel (petroleum ether : ethyl acetate : triethylamine = 70 : 1 : 1) to give **O<sub>2</sub>N-SiRB** (49 mg, 31% yield) as a yellow solid.  $^1H$  NMR (300 MHz,  $CDCl_3$ ):  $\delta$  0.59 (s, 3H), 0.63 (s, 3H), 1.16 (t, 12H,  $J = 7.2$  Hz), 3.37 (q, 8H,  $J = 7.2$  Hz), 6.48-8.80 (m, 9H);  $^{13}C$  NMR (75 MHz,  $CDCl_3$ ):  $\delta$  -1.36, 0.18, 12.52, 44.27, 92.56, 112.73, 115.88, 121.31, 125.70, 128.38, 128.52, 128.73, 136.82, 146.84, 148.57, 160.51, 168.49. HRMS (ESI) calcd. for  $C_{30}H_{35}N_3O_4Si$   $[M+H]^+$ : 530.2470, found: 530.2481.

**NC-SiRB.** Compound **3c** (293 mg) was added and the reaction mixture was stirred for 3 h. The mixture was purified by column chromatography on silica gel (petroleum ether : ethyl acetate : triethylamine = 60 : 1 : 1) to give **NC-SiRB** (50 mg, 31% yield) as a yellow solid.  $^1H$  NMR (300 MHz,  $CDCl_3$ ):  $\delta$  0.63 (s, 3H), 0.68 (s, 3H), 1.21 (t, 12H,  $J = 6.9$  Hz), 3.41 (q, 8H,  $J = 6.9$  Hz), 6.50-8.01 (m, 9H);  $^{13}C$  NMR (75 MHz,  $CDCl_3$ ):  $\delta$  -1.46, 0.27, 12.54, 44.31, 92.59, 112.68, 115.95, 117.16, 117.77, 126.43, 128.32, 128.65, 129.01, 130.54, 132.22, 137.03, 146.80, 155.29, 168.96. HRMS (ESI) calcd. for  $C_{31}H_{35}N_3O_2Si$   $[M+H]^+$ : 510.2571, found: 510.2581.

**HC≡C-SiRB.** Compound **3e** (293 mg) was added and the reaction mixture was stirred for 3 h. The mixture was purified by column chromatography on silica gel (petroleum ether : ethyl acetate : triethylamine = 80 : 1 : 1 ) to give **HC≡C-SiRB** (24 mg, 16% yield) as a white solid. <sup>1</sup>H NMR (300 MHz, CDCl<sub>3</sub>) δ 0.59 (s, 3H), 0.62 (s, 3H), 1.15 (t, 12H, *J* = 7.2 Hz), 3.22 (s, 1H ), 3.36 (q, 8H, *J* = 7.2 Hz), 6.48-7.92 (m, 9H); <sup>13</sup>C NMR (75 MHz, CDCl<sub>3</sub>) δ -1.55, 0.30, 12.55, 44.25, 80.57, 82.69, 92.10, 112.60, 115.82, 125.42, 127.14, 127.50, 128.28, 128.48, 130.12, 132.47, 136.98, 146.62, 154.60, 169.94. HRMS (ESI) calcd. for C<sub>32</sub>H<sub>36</sub>N<sub>2</sub>O<sub>2</sub>Si [M+H]<sup>+</sup>: 509.2619, found: 509.2614.

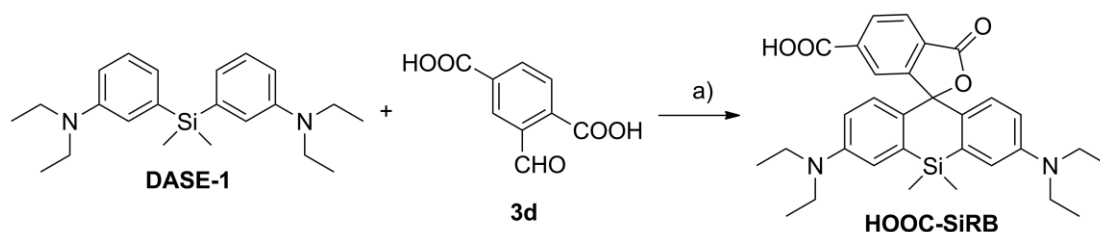

**Scheme S7.** Synthesis of **HOOC-SiRB**. Reaction conditions: a) TsOH·H<sub>2</sub>O, sealed tube, 140 °C, 8 h.

**HOOC-SiRB.** To a 15 mL sealable pressure tube charged with a magnetic stir bar were added the intermediate **DASE-1** (106 mg, 0.3 mmol, 1.0 equiv.), compound **3d** (291 mg, 1.5 mmol, 5.0 equiv.) and *p*-toluenesulfonic acid monohydrate (57 mg, 0.3 mmol, 1.0 equiv.). The tube was sealed tightly and heated at 140 °C for 8 h. [**Caution:** To avoid potential danger, the reaction tube was placed behind a blast shield.] After cooling to room temperature, the reaction mixture was dissolved in dichloromethane / methanol (5 mL / 5 mL) and purified by column chromatography on silica gel (petroleum ether : ethyl acetate = 10 : 1) to give **HOOC-SiRB** (18 mg, 11% yield) as a blue solid. <sup>1</sup>H NMR (600 MHz, CDCl<sub>3</sub> and CD<sub>3</sub>OD) δ 0.55 (s, 3H), 0.60 (s, 3H), 1.11 (t, 12H, *J* = 7.2 Hz), 3.32 (q, 8H, *J* = 7.2 Hz), 6.45-8.20 (m, 9H); <sup>13</sup>C NMR (150 MHz, CDCl<sub>3</sub> and CD<sub>3</sub>OD) δ -1.84, 0.14, 12.37, 44.23, 89.23, 112.62, 116.06, 125.40, 126.24, 128.35, 129.90, 130.17, 130.40, 135.86, 137.22, 146.68, 154.37, 170.48. HRMS (ESI) calcd. for C<sub>31</sub>H<sub>36</sub>N<sub>2</sub>O<sub>4</sub>Si [M+H]<sup>+</sup>: 529.2517, found: 529.2519.

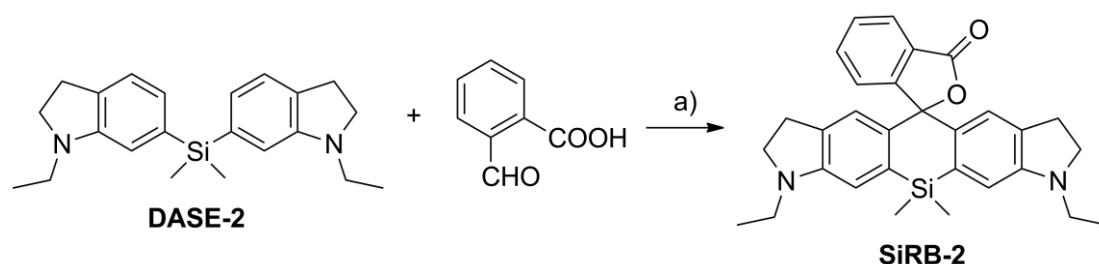

**Scheme S8.** Synthesis of **SiRB2**. Reaction conditions: a)  $\text{CuBr}_2$ , sealed tube,  $140\text{ }^\circ\text{C}$ , 5 h.

**SiRB-2.** To a 15 mL sealable pressure tube charged with a magnetic stir bar were added the intermediate **DASE-2** (175 mg, 0.5 mmol, 1.0 equiv.), 2-formylbenzoic acid (375 mg, 2.5 mmol, 5.0 equiv.) and copper(II) bromide (11 mg, 0.05 mmol, 0.1 equiv.). The tube was sealed tightly and heated at  $140\text{ }^\circ\text{C}$  for 5 h. [**Caution:** To avoid potential danger, the reaction tube was placed behind a blast shield.] After cooling to room temperature, the reaction mixture was dissolved in 10 mL dichloromethane and purified by column chromatography on silica gel (petroleum ether : ethyl acetate : triethylamine = 70 : 1 : 1) to give **SiRB-2** (38 mg, 16% yield) as a white solid.  $^1\text{H}$  NMR (300 MHz,  $\text{CDCl}_3$ ):  $\delta$  0.54 (s, 3H), 0.58 (s, 3H), 1.18 (t, 12H,  $J = 7.2\text{ Hz}$ ), 2.70-2.88 (m, 4H), 3.18 (q, 4H,  $J = 7.2\text{ Hz}$ ), 3.29 (t, 4H,  $J = 8.4\text{ Hz}$ ), 6.63-7.96 (m, 8H);  $^{13}\text{C}$  NMR (75 MHz,  $\text{CDCl}_3$ ):  $\delta$  -0.39, 0.06, 12.04, 28.37, 42.67, 51.70, 92.06, 109.97, 123.47, 123.83, 125.49, 125.77, 128.37, 132.54, 133.03, 133.95, 134.07, 151.37, 156.39, 171.46. HRMS (ESI) calcd. for  $\text{C}_{30}\text{H}_{32}\text{N}_2\text{O}_2\text{Si}$   $[\text{M}+\text{H}]^+$ : 481.2306, found: 481.2307.

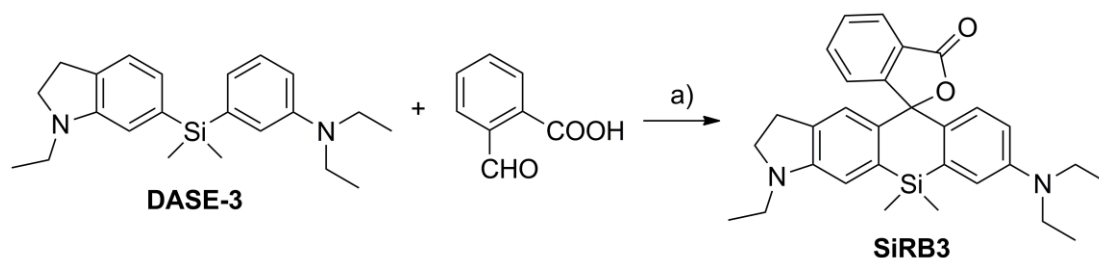

**Scheme S9.** Synthesis of **SiRB-3**. Reaction conditions: a)  $\text{CuBr}_2$ , sealed tube,  $140\text{ }^\circ\text{C}$ , 5 h.



**SiRB-3.** To a 15 mL sealable pressure tube charged with a magnetic stir bar were added the intermediate **DASE-3** (176 mg, 0.5 mmol, 1.0 equiv.), 2-formylbenzoic acid (375 mg, 2.5 mmol, 5.0 equiv.) and copper(II) bromide (11 mg, 0.05 mmol, 0.1 equiv.). The tube was sealed tightly and heated at 140 °C for 5 h. [**Caution:** To avoid potential danger, the reaction tube was placed behind a blast shield.] After cooling to room temperature, the reaction mixture was dissolved in 10 mL dichloromethane and purified by column chromatography on silica gel (petroleum ether : ethyl acetate : triethylamine = 70 : 1 : 1 ) to give **SiRB-3** (75 mg, 31% yield) as a white solid.  $^1\text{H}$  NMR (300 MHz,  $\text{CDCl}_3$ ):  $\delta$  0.57 (s, 3H), 0.61 (s, 3H), 1.14 (t, 6H,  $J = 7.2$  Hz), 1.19 (t, 3H,  $J = 7.2$  Hz), 2.78 (t, 2H,  $J = 7.8$  Hz), 3.19 (q, 2H,  $J = 7.2$  Hz), 3.29 (t, 2H,  $J = 8.1$  Hz), 3.35 (q, 4H,  $J = 6.9$  Hz), 6.51-7.97 (m, 9H);  $^{13}\text{C}$  NMR (75 MHz,  $\text{CDCl}_3$ ):  $\delta$  -1.08, 0.26, 12.03, 12.52, 28.38, 42.68, 44.26, 51.73, 92.16, 110.32, 112.74, 115.59, 123.58, 124.35, 125.53, 126.63, 128.47, 130.63, 132.28, 133.18, 133.81, 134.78, 136.66, 146.33, 146.55, 151.47, 155.25, 171.00. HRMS (ESI) calcd. for  $\text{C}_{30}\text{H}_{34}\text{N}_2\text{O}_2\text{Si}$   $[\text{M}+\text{H}]^+$ : 483.2462, found: 483.2461.

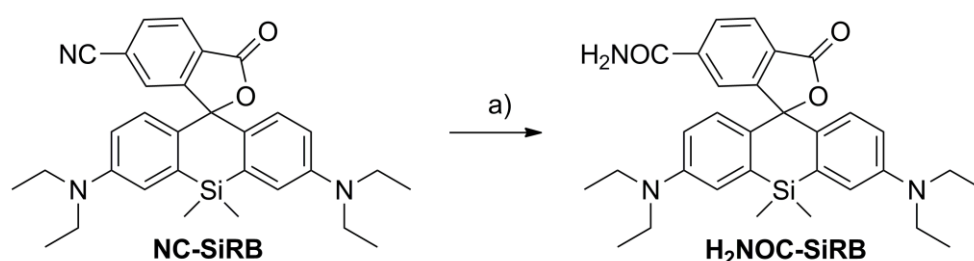

**Scheme S9.** Synthesis of **H<sub>2</sub>NOC-SiR**. Reaction conditions: a)  $\text{K}_2\text{CO}_3$ ,  $\text{H}_2\text{O}_2$ , DMSO, 60 °C, 1 h.

**H<sub>2</sub>NOC-SiRB**<sup>6</sup>. To a solution of **NC-SiRB** (51 mg, 0.10 mmol) and potassium carbonate (17 mg, 0.12 mmol) in DMSO (5 mL) was added hydrogen peroxide (200  $\mu\text{L}$ , 30% aqueous solution). The reaction mixture was stirred and heated at 60 °C for 1 h, then poured into iced water (25 mL) and extracted with dichloromethane (15 mL  $\times$  3). The combined organic layer was washed with brine and dried over anhydrous  $\text{Na}_2\text{SO}_4$ . After filtration and removal of the solvent under reduced pressure, the

residue was purified by column chromatography on silica gel (petroleum ether : ethyl acetate : trimethylamine = 100 : 10 : 1) to provide **H<sub>2</sub>NOC-SiRB** (35 mg, 67% yield) as a white solid. <sup>1</sup>H NMR (300 MHz, CDCl<sub>3</sub>) δ 0.58 (s, 3H), 0.63 (s, 3H), 1.15 (t, 12H, *J* = 6.9 Hz), 3.35 (q, 8H, *J* = 6.9 Hz), 6.46-8.01 (m, 9H); <sup>13</sup>C NMR (75 MHz, CDCl<sub>3</sub>) δ -1.52, 0.30, 12.54, 44.25, 92.55, 112.67, 115.83, 123.55, 125.85, 127.93, 128.55, 129.83, 130.01, 137.06, 138.40, 146.68, 155.15, 168.09, 169.81. HRMS (ESI) calcd. for C<sub>31</sub>H<sub>37</sub>N<sub>3</sub>O<sub>3</sub>Si [M+H]<sup>+</sup>: 528.2677, found: 528.2676.

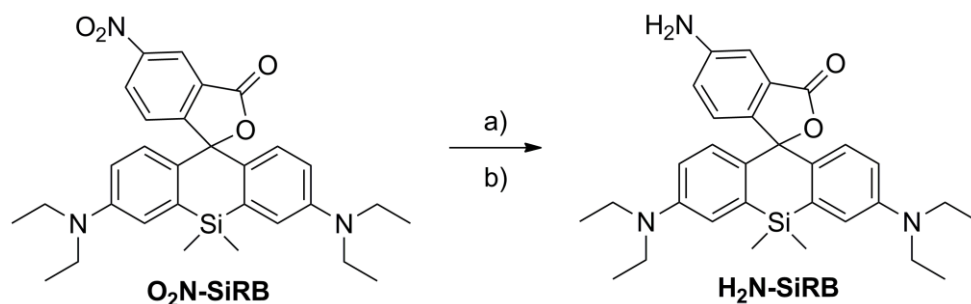

**Scheme S10** . Synthesis of **H<sub>2</sub>N-SiRB**. a) H<sub>2</sub>, 10% Pd/C, methanol/dichloromethane, RT, 4 h; b) methanol/dichloromethane, chloranil, RT, 10 min.

**H<sub>2</sub>N-SiRB**<sup>7</sup>. To a solution of **O<sub>2</sub>N-SiRB** (106 mg, 0.20 mmol) in methanol/dichloromethane (15 mL/10 mL), 10% Pd/C (50 mg) was added. The reaction mixture was stirred under a H<sub>2</sub> atmosphere for 4 h at room temperature. After the reaction mixture was filtered through Celite, chloranil (68 mg, 0.3 mmol) was added into the filtrate. The mixture was stirred for 10 min at room temperature. After filtration and removal of the solvent under reduced pressure, the residue was purified by column chromatography on silica gel (petroleum ether : ethyl acetate : trimethylamine = 100 : 10 : 1) to give **H<sub>2</sub>N-SiRB** (79 mg, 79% yield) as light yellow solid. <sup>1</sup>H NMR (300 MHz, CDCl<sub>3</sub>) δ 0.60 (s, 6H), 1.14 (t, 12H, *J* = 6.9 Hz), 3.35 (q, 8H, *J* = 6.9 Hz), 3.97 (s, 2H), 6.44-7.25 (m, 9H); <sup>13</sup>C NMR (75 MHz, CDCl<sub>3</sub>) δ -2.18, 0.58, 12.56, 44.26, 92.46, 109.53, 112.22, 116.06, 121.11, 125.72, 128.46, 129.24, 131.62, 137.75, 143.44, 146.52, 147.21, 170.70. HRMS (ESI) calcd. for C<sub>30</sub>H<sub>35</sub>N<sub>3</sub>O<sub>2</sub>Si [M+H]<sup>+</sup>: 500.2728, found: 500.2712.

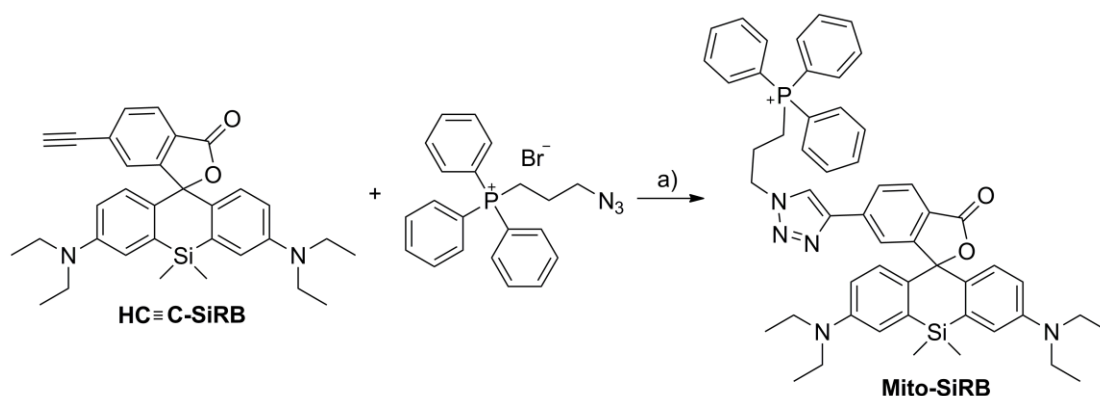

**Scheme S11.** Synthesis of **Mito-SiRB**. Reaction conditions: a) THF,  $\text{CuSO}_4 \cdot 5\text{H}_2\text{O}$ , sodium ascorbate, RT, 24 h.

**Mito-SiRB.** To a 10 mL reaction tube flushed with argon were added **HC≡C-SiRB** (20 mg, 0.039 mmol), (3-azidopropyl)triphenylphosphonium bromide (15 mg, 0.035 mmol) and THF (2 mL).  $\text{CuSO}_4 \cdot 5\text{H}_2\text{O}$  (3 mg, 0.01 mmol) and sodium ascorbate (4.0 mg, 0.02 mmol) dissolved in  $\text{H}_2\text{O}$  (0.8 mL) were added into the reaction mixture. After stirred at room temperature for 24 h, the solvent was removed under reduced pressure. Water (10 mL) was added and the mixture was extracted with dichloromethane (15 mL  $\times$  3). The organic layers were combined, washed with brine and dried over anhydrous  $\text{Na}_2\text{SO}_4$ . After filtration and removal of the solvent under reduced pressure, the residue was purified by column chromatography on silica gel (dichloromethane : methanol= 20 : 1) to give **Mito-SiRB** (20 mg, 61% yield) as a light green solid.  $^1\text{H}$  NMR (300 MHz,  $\text{CDCl}_3$ )  $\delta$  0.58 (s, 3H), 0.66 (s, 3H), 1.14 (t, 12H,  $J = 6.9$  Hz), 2.02 (s, 1H), 2.33-2.40 (m, 2H), 3.34 (q, 8H,  $J = 6.9$  Hz), 3.87-3.97 (m, 2H), 5.02-5.06 (m, 2H), 6.47-8.68 (m, 25H);  $^{13}\text{C}$  NMR (75 MHz,  $\text{CDCl}_3$ )  $\delta$  -1.36, 0.31, 12.56, 19.29, 20.00, 23.40, 44.29, 49.08, 49.38, 92.13, 112.87, 117.20, 118.34, 121.24, 124.02, 125.92, 126.24, 126.53, 128.65, 130.50, 130.67, 133.52, 133.65, 135.17, 135.21, 136.18, 136.81, 146.19, 146.49, 155.66, 170.66. HRMS (ESI) calcd. for  $\text{C}_{53}\text{H}_{57}\text{N}_5\text{O}_2\text{PSi}^+$   $[\text{M}]^+$ : 854.4014, found: 854.4019.

# $^1\text{H}$ NMR, $^{13}\text{C}$ NMR and HRMS Spectra.

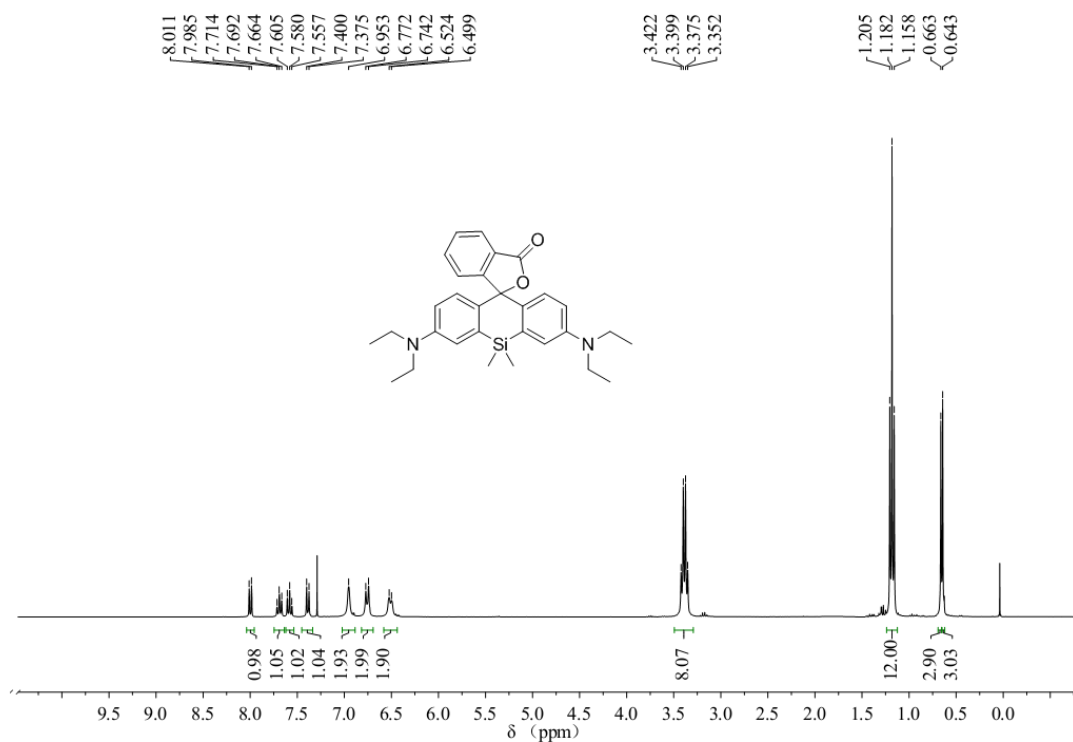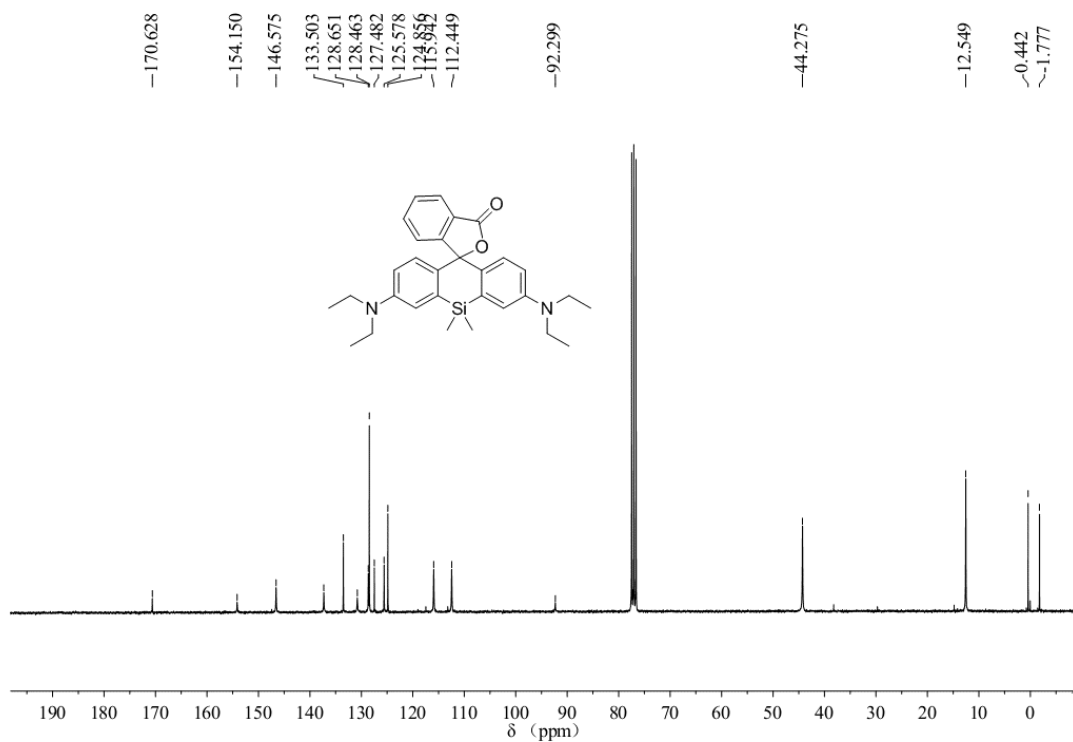

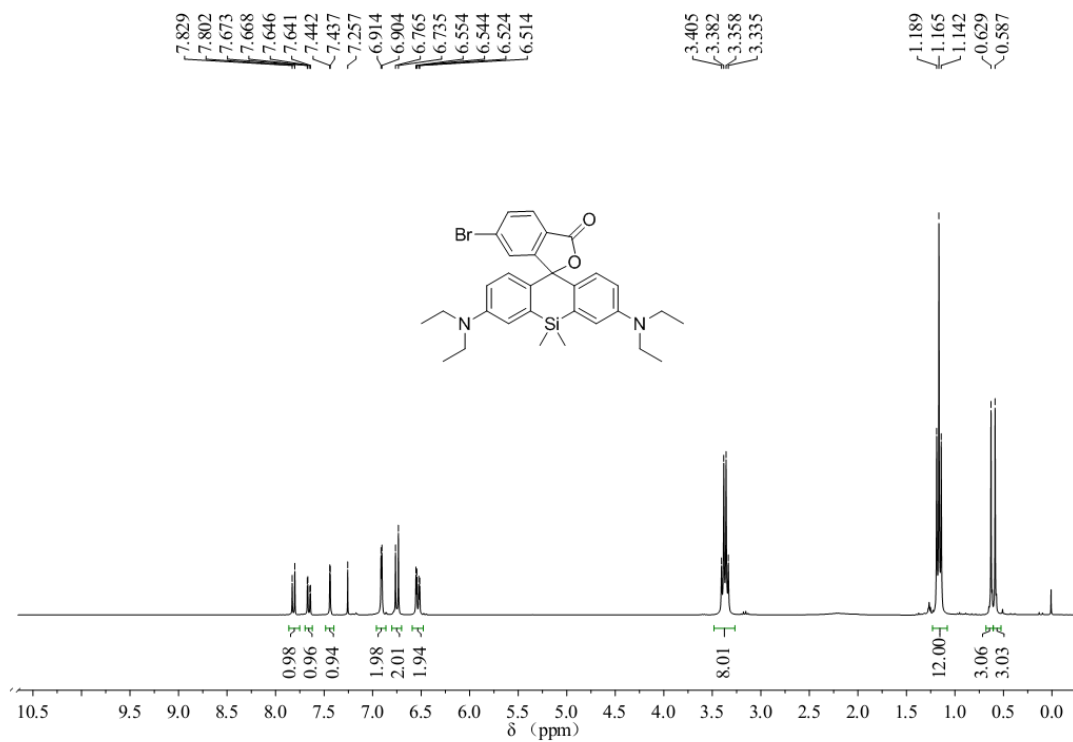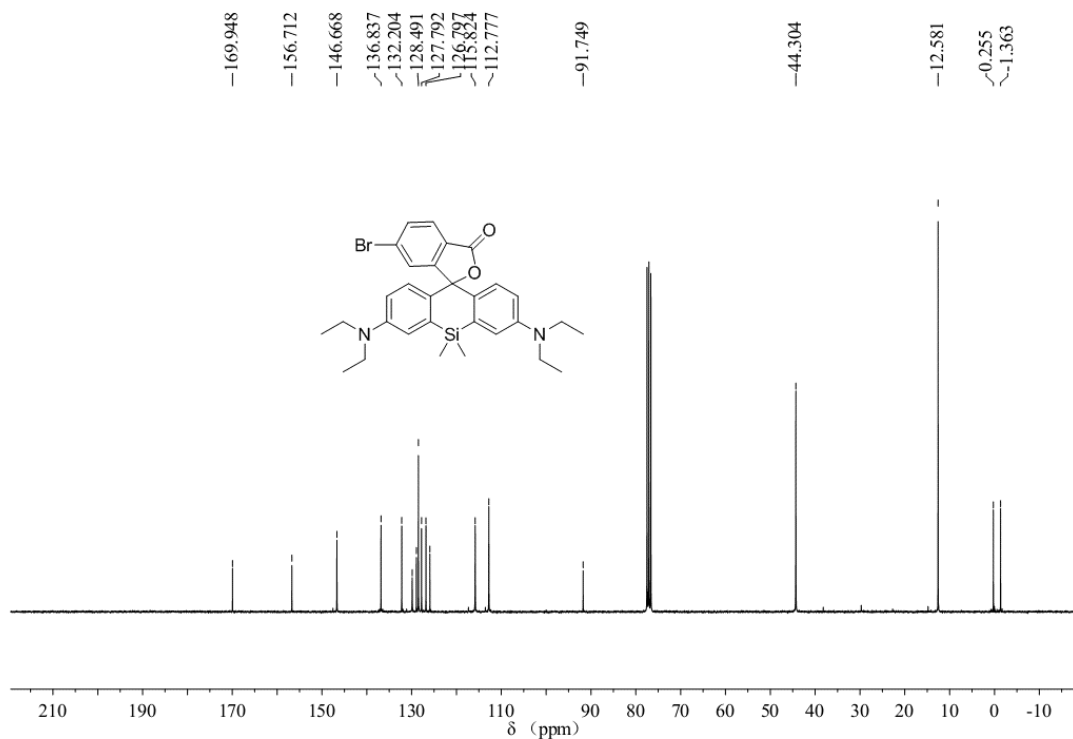

## Qualitative Analysis Report

|                        |                      |               |                      |
|------------------------|----------------------|---------------|----------------------|
| Data Filename          | WT-WBG-SIRB-CN-POS.d | Sample Name   | WT-WBG-SIRB-CN       |
| Sample Type            | Sample               | Position      | P1-E2                |
| Instrument Name        | Instrument 1         | User Name     |                      |
| Acq Method             | TEST-POS-01-WL.m     | Acquired Time | 6/25/2013 3:59:38 PM |
| IRM Calibration Status | Success              | DA Method     | Default.m            |
| Comment                |                      |               |                      |

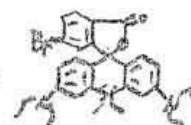

### User Spectra

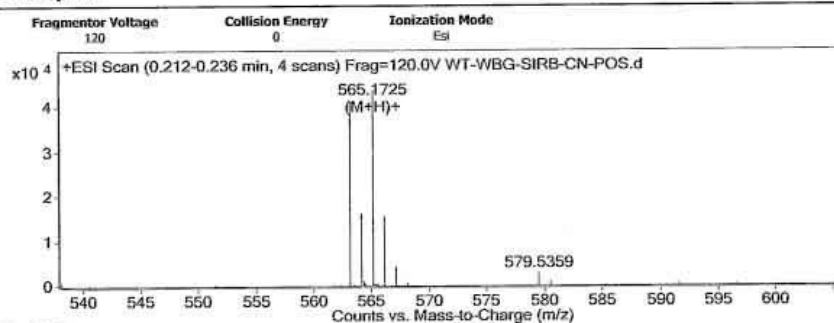

### Peak List

| m/z      | z | Abund | Formula             | Ion    |
|----------|---|-------|---------------------|--------|
| 117.0551 |   | 7990  |                     |        |
| 121.0509 |   | 9213  |                     |        |
| 274.2748 |   | 5440  |                     |        |
| 298.2752 | 1 | 17832 |                     |        |
| 300.2904 | 1 | 10347 |                     |        |
| 413.3789 | 1 | 6950  |                     |        |
| 563.174  | 1 | 41186 | C30 H36 Br N2 O2 Si | (M+H)+ |
| 564.1772 | 1 | 16339 | C30 H36 Br N2 O2 Si | (M+H)+ |
| 565.1725 | 1 | 43490 | C30 H36 Br N2 O2 Si | (M+H)+ |
| 566.175  | 1 | 15451 | C30 H36 Br N2 O2 Si | (M+H)+ |

### Formula Calculator Element Limits

| Element | Min | Max |
|---------|-----|-----|
| C       | 3   | 200 |
| H       | 0   | 400 |
| N       | 0   | 6   |
| O       | 0   | 10  |
| Si      | 0   | 1   |
| Br      | 0   | 1   |

### Formula Calculator Results

| Formula             | Best | Mass     | Tgt Mass | Diff (ppm) | Ion Species         | Score |
|---------------------|------|----------|----------|------------|---------------------|-------|
| C30 H35 Br N2 O2 Si | TRUE | 562.1668 | 562.1651 | -2.93      | C30 H36 Br N2 O2 Si | 94.68 |

— End Of Report —

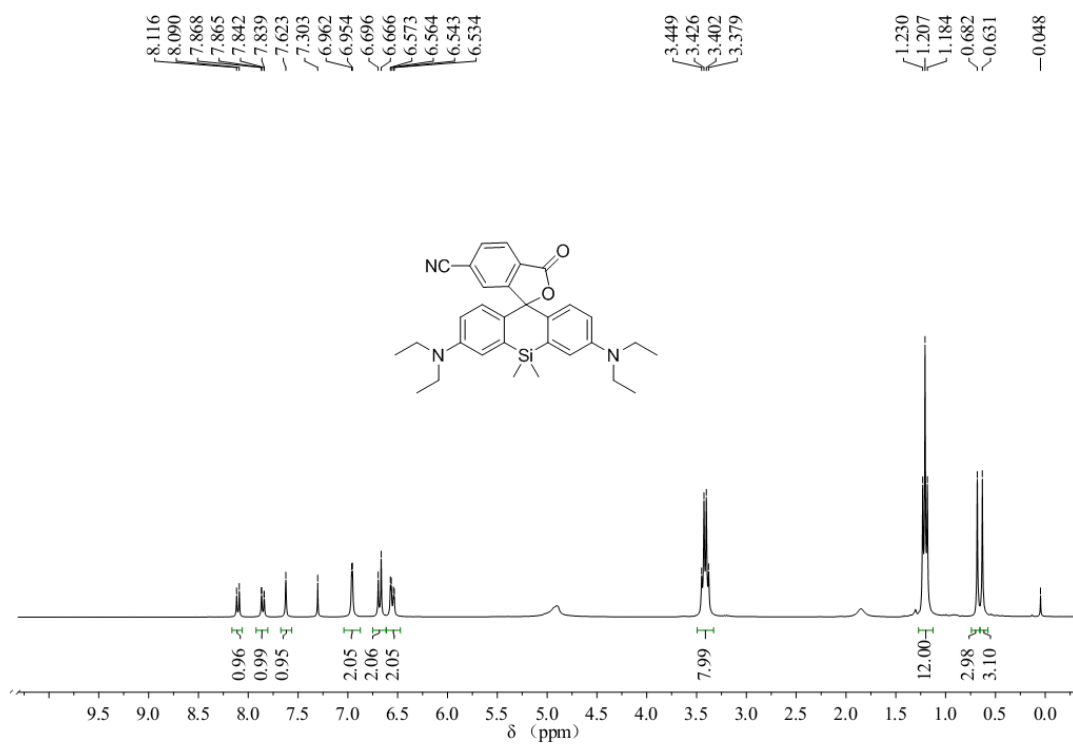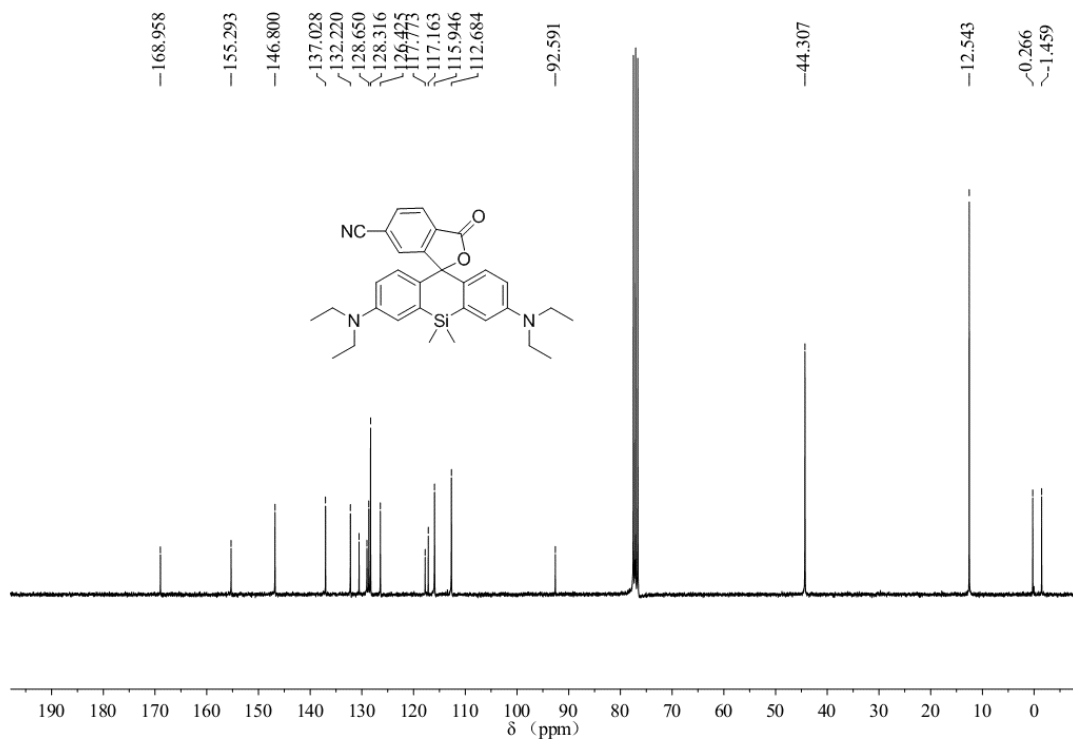

## Qualitative Analysis Report

|                               |                       |                      |                      |
|-------------------------------|-----------------------|----------------------|----------------------|
| <b>Data Filename</b>          | CN                    | <b>Sample Name</b>   | WT-WBG-SIRB-NO2      |
| <b>Sample Type</b>            | WT-WBG-SIRB-NO2-POS.d | <b>Position</b>      | P1-E1                |
| <b>Instrument Name</b>        | Sample                | <b>User Name</b>     |                      |
| <b>Acq Method</b>             | Instrument 1          | <b>Acquired Time</b> | 6/25/2013 3:58:01 PM |
| <b>IRM Calibration Status</b> | TEST-POS-01-WL.m      | <b>DA Method</b>     | Default.m            |
| <b>Comment</b>                | Success               |                      |                      |

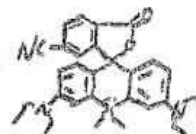

### User Spectra

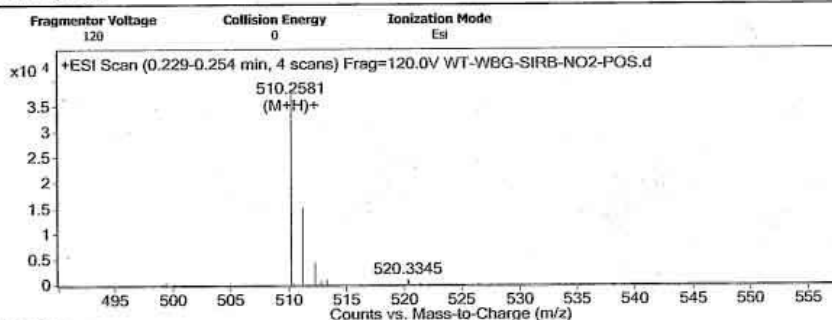

### Peak List

| m/z      | z | Abund | Formula          | Ion    |
|----------|---|-------|------------------|--------|
| 117.0546 |   | 8397  |                  |        |
| 121.0509 |   | 8383  |                  |        |
| 265.1128 | 1 | 4517  |                  |        |
| 274.2745 | 1 | 4712  |                  |        |
| 298.2745 | 1 | 17216 |                  |        |
| 300.2902 | 1 | 9903  |                  |        |
| 302.3054 | 1 | 4873  |                  |        |
| 413.3783 | 1 | 6128  |                  |        |
| 510.2581 | 1 | 38248 | C31 H36 N3 O2 Si | (M+H)+ |
| 511.2608 | 1 | 15088 | C31 H36 N3 O2 Si | (M+H)+ |

### Formula Calculator Element Limits

| Element | Min | Max |
|---------|-----|-----|
| C       | 3   | 200 |
| H       | 0   | 400 |
| N       | 0   | 6   |
| O       | 0   | 10  |
| Si      | 0   | 1   |

### Formula Calculator Results

| Formula          | Best | Mass     | Tgt Mass | Diff (ppm) | Ion Species      | Score |
|------------------|------|----------|----------|------------|------------------|-------|
| C31 H35 N3 O2 Si | TRUE | 509.2508 | 509.2499 | -1.94      | C31 H36 N3 O2 Si | 97.54 |

— End Of Report —



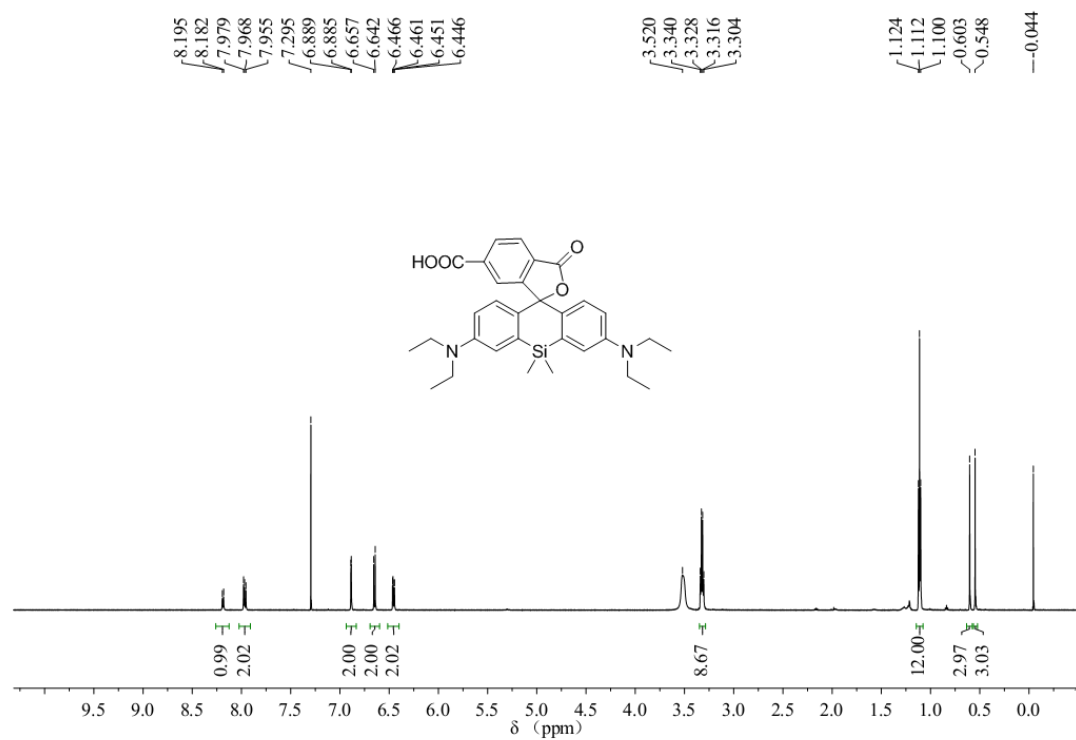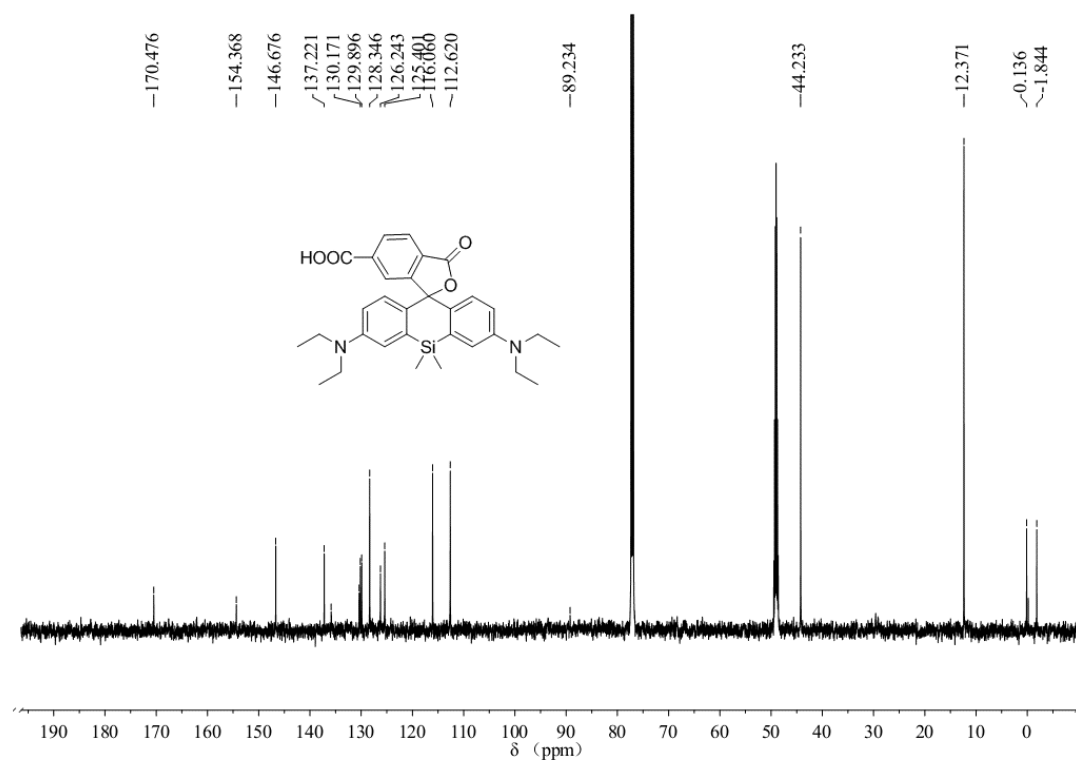

## Qualitative Analysis Report

|                        |                  |               |                     |
|------------------------|------------------|---------------|---------------------|
| Data Filename          | SIRB-COOH.d      | Sample Name   | SIRB-COOH           |
| Sample Type            | Sample           | Position      | P1-E3               |
| Instrument Name        | Instrument 1     | User Name     |                     |
| Acq Method             | TEST-POS.m       | Acquired Time | 6/4/2013 3:36:51 PM |
| IRM Calibration Status | Some Ions Missed | DA Method     | ERROR.m             |
| Comment                |                  |               |                     |
| Sample Group           | Info.            |               |                     |

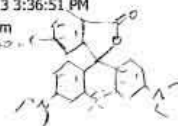

### User Spectra

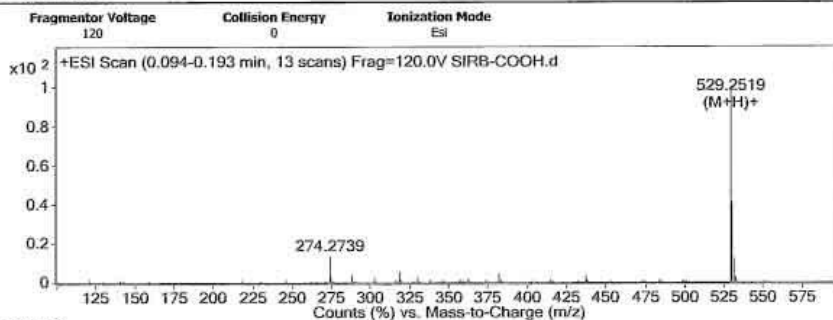

#### Peak List

| m/z      | z | Abund   | Formula          | Ion    |
|----------|---|---------|------------------|--------|
| 274.2739 |   | 204686  |                  |        |
| 318.3001 |   | 80061   |                  |        |
| 529.2519 | 1 | 1502819 | C31 H37 N2 O4 Si | (M+H)+ |
| 530.2547 | 1 | 615729  | C31 H37 N2 O4 Si | (M+H)+ |
| 531.2556 | 1 | 185306  | C31 H37 N2 O4 Si | (M+H)+ |

#### Formula Calculator Element Limits

| Element | Min | Max |
|---------|-----|-----|
| C       | 3   | 100 |
| H       | 0   | 300 |
| N       | 0   | 5   |
| Si      | 0   | 5   |
| O       | 0   | 5   |

#### Formula Calculator Results

| Formula          | Best | Mass     | Tgt Mass | Diff (ppm) | Ion Species      | Score |
|------------------|------|----------|----------|------------|------------------|-------|
| C31 H36 N2 O4 Si | TRUE | 528.2447 | 528.2444 | -0.43      | C31 H37 N2 O4 Si | 99.67 |

--- End Of Report ---

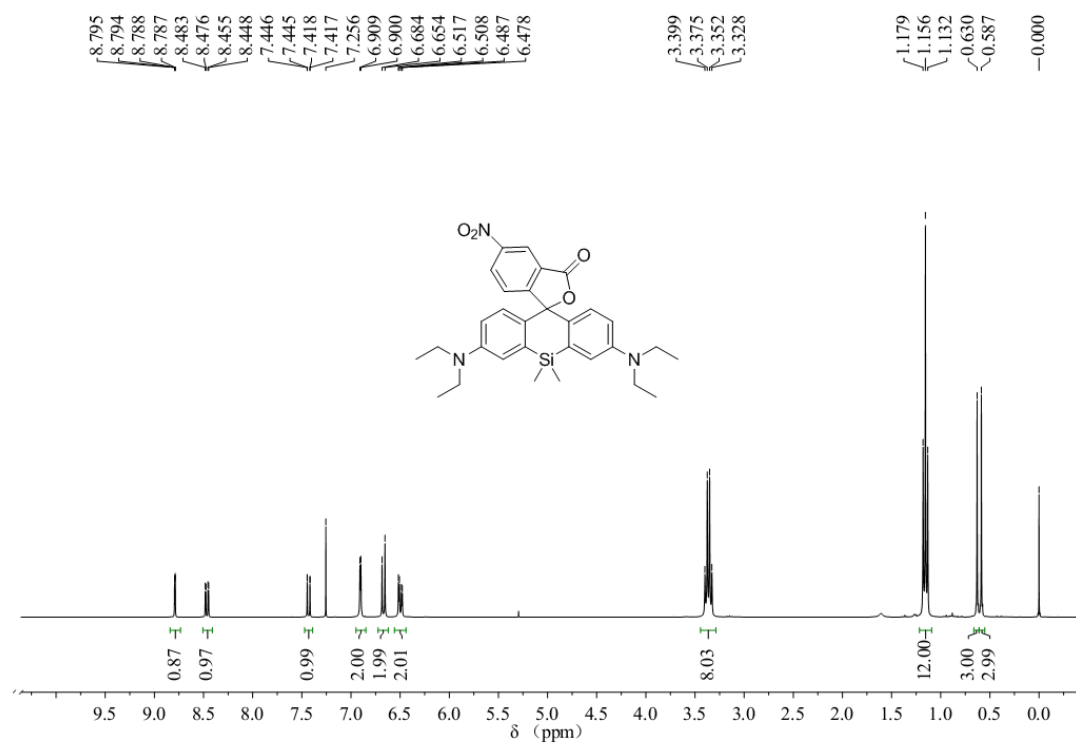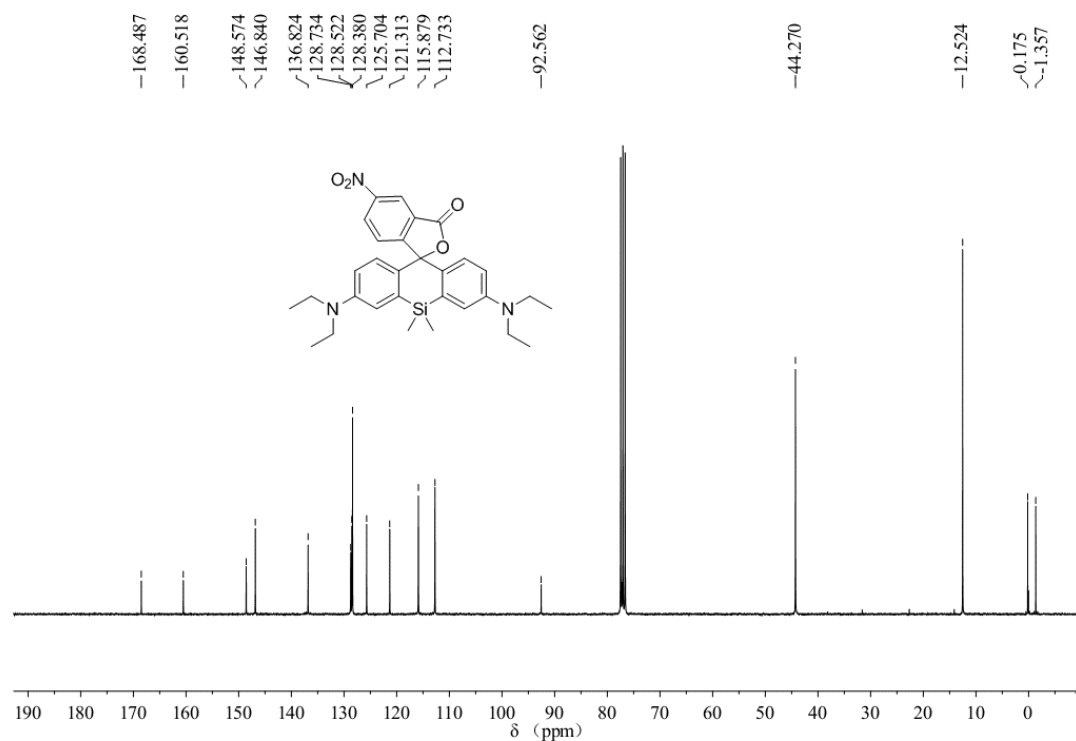

## Qualitative Analysis Report

|                               |                      |                      |                      |
|-------------------------------|----------------------|----------------------|----------------------|
| <b>Data Filename</b>          | WT-WBG-SIRB-BR-POS.d | <b>Sample Name</b>   | WT-WBG-SIRB-BR       |
| <b>Sample Type</b>            | Sample               | <b>Position</b>      | P1-E3                |
| <b>Instrument Name</b>        | Instrument 1         | <b>User Name</b>     |                      |
| <b>Acq Method</b>             | TEST-POS-01-WL.m     | <b>Acquired Time</b> | 6/25/2013 4:01:14 PM |
| <b>IRM Calibration Status</b> | Success              | <b>DA Method</b>     | Default.m            |
| <b>Comment</b>                |                      |                      |                      |

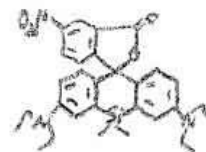

### User Spectra

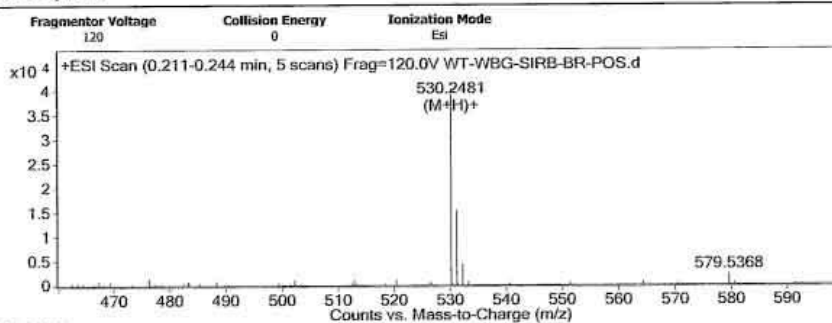

#### Peak List

| m/z      | z | Abund | Formula          | Ion    |
|----------|---|-------|------------------|--------|
| 117.0547 |   | 9292  |                  |        |
| 121.0509 |   | 8474  |                  |        |
| 173.1649 |   | 6929  |                  |        |
| 274.2749 |   | 5868  |                  |        |
| 298.275  | 1 | 18946 |                  |        |
| 300.2899 | 1 | 9994  |                  |        |
| 302.3059 | 1 | 6052  |                  |        |
| 413.3783 | 1 | 7746  |                  |        |
| 530.2481 | 1 | 40108 | C30 H36 N3 O4 Si | (M+H)+ |
| 531.2505 | 1 | 15520 | C30 H36 N3 O4 Si | (M+H)+ |

#### Formula Calculator Element Limits

| Element | Min | Max |
|---------|-----|-----|
| C       | 3   | 200 |
| H       | 0   | 400 |
| N       | 0   | 6   |
| O       | 0   | 10  |
| Si      | 0   | 1   |
| Br      | 0   | 1   |

#### Formula Calculator Results

| Formula          | Best | Mass     | Tgt Mass | Diff (ppm) | Ion Species      | Score |
|------------------|------|----------|----------|------------|------------------|-------|
| C30 H35 N3 O4 Si | TRUE | 529.2408 | 529.2397 | -2.11      | C30 H36 N3 O4 Si | 97.28 |

— End Of Report —

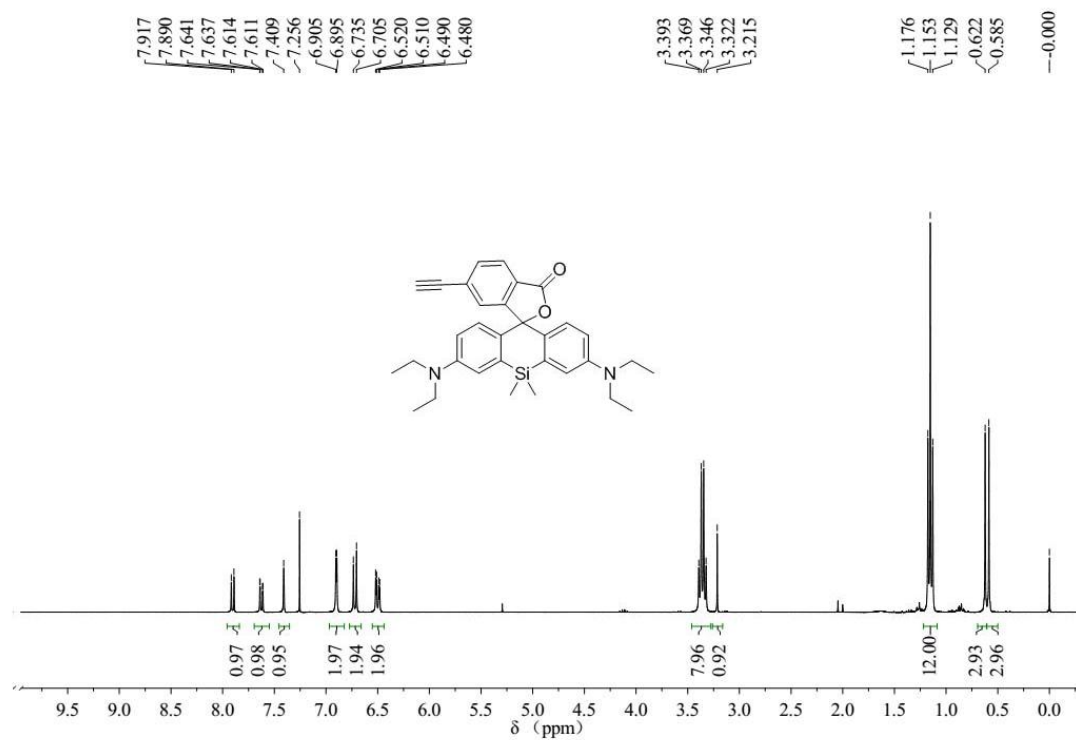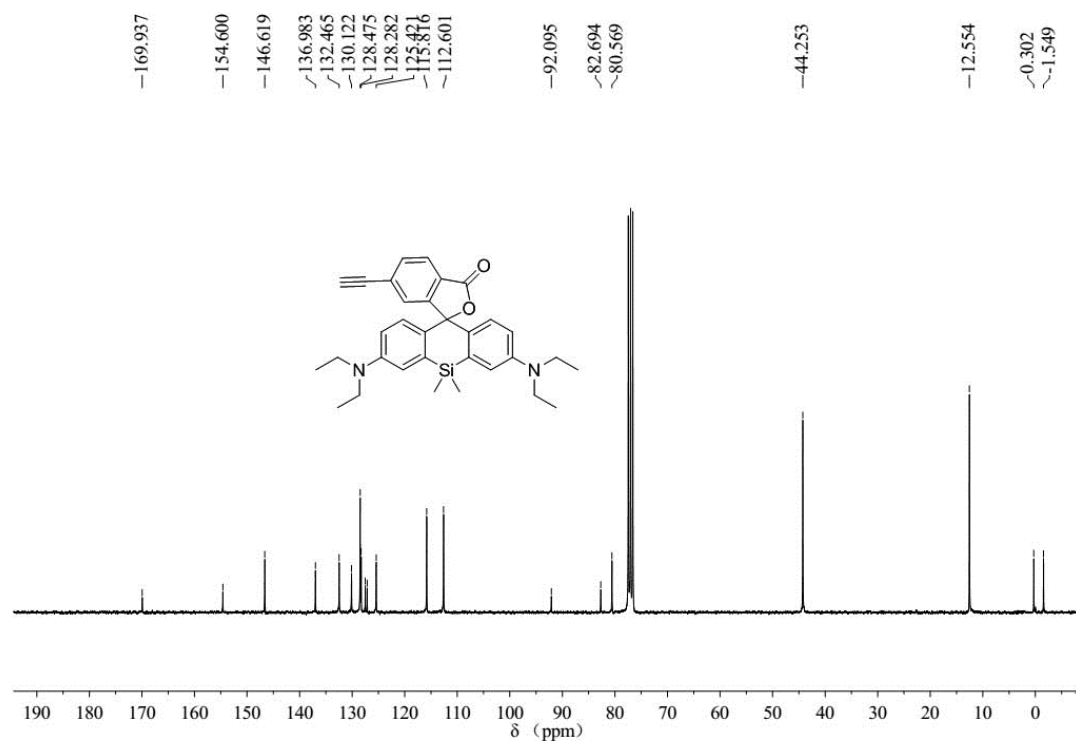

## Qualitative Analysis Report

|                        |                 |               |                      |
|------------------------|-----------------|---------------|----------------------|
| Data Filename          | WBG-SIRB-CCH.d  | Sample Name   | WBG-SIRB-CCH         |
| Sample Type            | Sample          | Position      | P1-B9                |
| Instrument Name        | Instrument 1    | User Name     |                      |
| Acq Method             | TEST-POS-01-WLM | Acquired Time | 4/8/2014 11:14:52 AM |
| IRM Calibration Status | Success         | DA Method     | 1.m                  |
| Comment                |                 |               |                      |

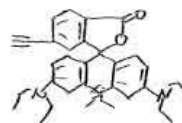

### User Spectra

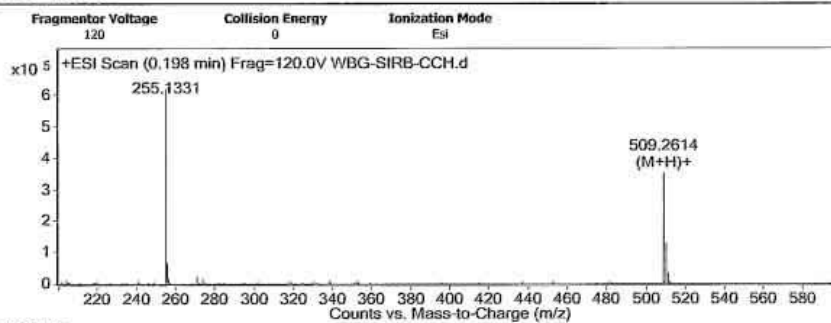

### Peak List

| m/z      | z | Abund  | Formula          | Ion    |
|----------|---|--------|------------------|--------|
| 121.0509 |   | 118073 |                  |        |
| 125.9863 |   | 47384  |                  |        |
| 255.1331 | 2 | 620043 |                  |        |
| 255.6365 | 2 | 223524 |                  |        |
| 256.1367 | 2 | 68071  |                  |        |
| 509.2614 | 1 | 351208 | C32 H37 N2 O2 Si | (M+H)+ |
| 510.2647 | 1 | 128673 | C32 H37 N2 O2 Si | (M+H)+ |
| 511.266  | 1 | 32778  | C32 H37 N2 O2 Si | (M+H)+ |

### Formula Calculator Element Limits

| Element | Min | Max |
|---------|-----|-----|
| C       | 3   | 200 |
| H       | 0   | 300 |
| O       | 1   | 3   |
| N       | 1   | 3   |
| Si      | 1   | 2   |

### Formula Calculator Results

| Formula          | Best | Mass     | Igt Mass | Diff (ppm) | Ion Species      | Score |
|------------------|------|----------|----------|------------|------------------|-------|
| C32 H36 N2 O2 Si | TRUE | 508.2542 | 508.2546 | 0.81       | C32 H37 N2 O2 Si | 97.43 |

--- End Of Report ---

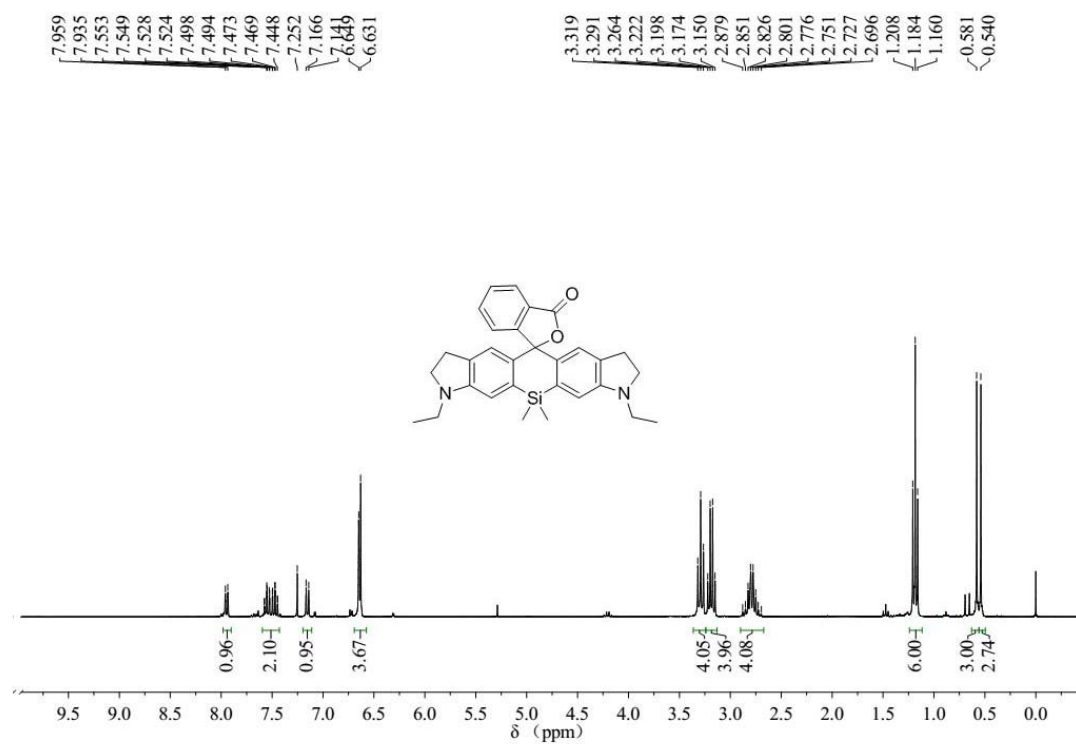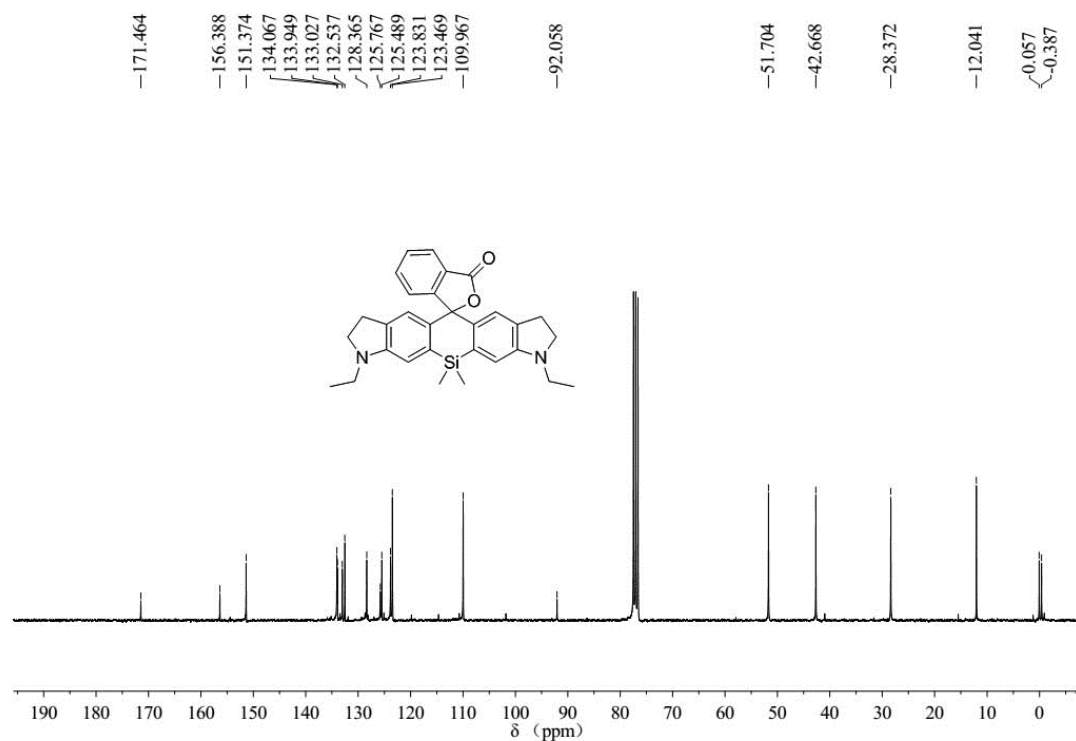

## Qualitative Analysis Report

|                        |                  |               |                      |
|------------------------|------------------|---------------|----------------------|
| Data Filename          | WBG-SIRB-3.d     | Sample Name   | WBG-SIRB-3           |
| Sample Type            | Sample           | Position      | P1-B7                |
| Instrument Name        | Instrument 1     | User Name     |                      |
| Acq Method             | TEST-POS-01-VL.m | Acquired Time | 4/8/2014 11:11:39 AM |
| IRM Calibration Status | Success          | DA Method     | 1.m                  |
| Comment                |                  |               |                      |

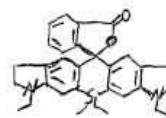

### User Spectra

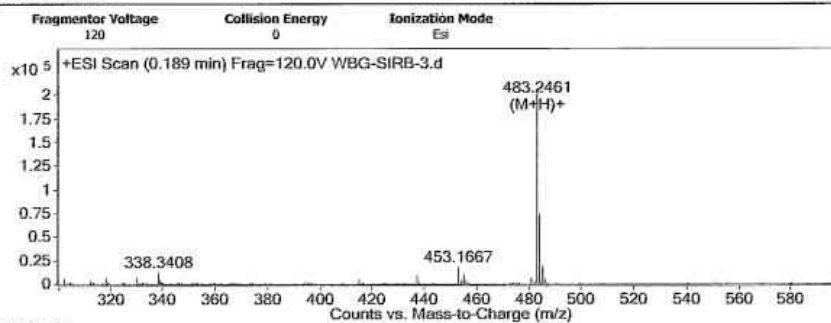

### Peak List

| m/z      | z | Abund  | Formula          | Ion    |
|----------|---|--------|------------------|--------|
| 118.0656 |   | 35057  |                  |        |
| 121.0509 |   | 102382 |                  |        |
| 125.9862 |   | 20058  |                  |        |
| 242.127  | 2 | 79917  |                  |        |
| 242.6284 | 2 | 31704  |                  |        |
| 271.1877 |   | 37105  |                  |        |
| 453.1667 |   | 17425  |                  |        |
| 483.2461 | 1 | 206632 | C30 H35 N2 O2 Si | (M+H)+ |
| 484.2487 | 1 | 73691  | C30 H35 N2 O2 Si | (M+H)+ |
| 485.2496 | 1 | 18963  | C30 H35 N2 O2 Si | (M+H)+ |

### Formula Calculator Element Limits

| Element | Min | Max |
|---------|-----|-----|
| C       | 3   | 200 |
| H       | 0   | 300 |
| O       | 1   | 3   |
| N       | 1   | 3   |
| Si      | 1   | 2   |

### Formula Calculator Results

| Formula          | Best | Mass     | Tgt Mass | Diff (ppm) | Ion Species      | Score |
|------------------|------|----------|----------|------------|------------------|-------|
| C30 H34 N2 O2 Si | TRUE | 482.2388 | 482.239  | 0.26       | C30 H35 N2 O2 Si | 98.69 |

— End Of Report —



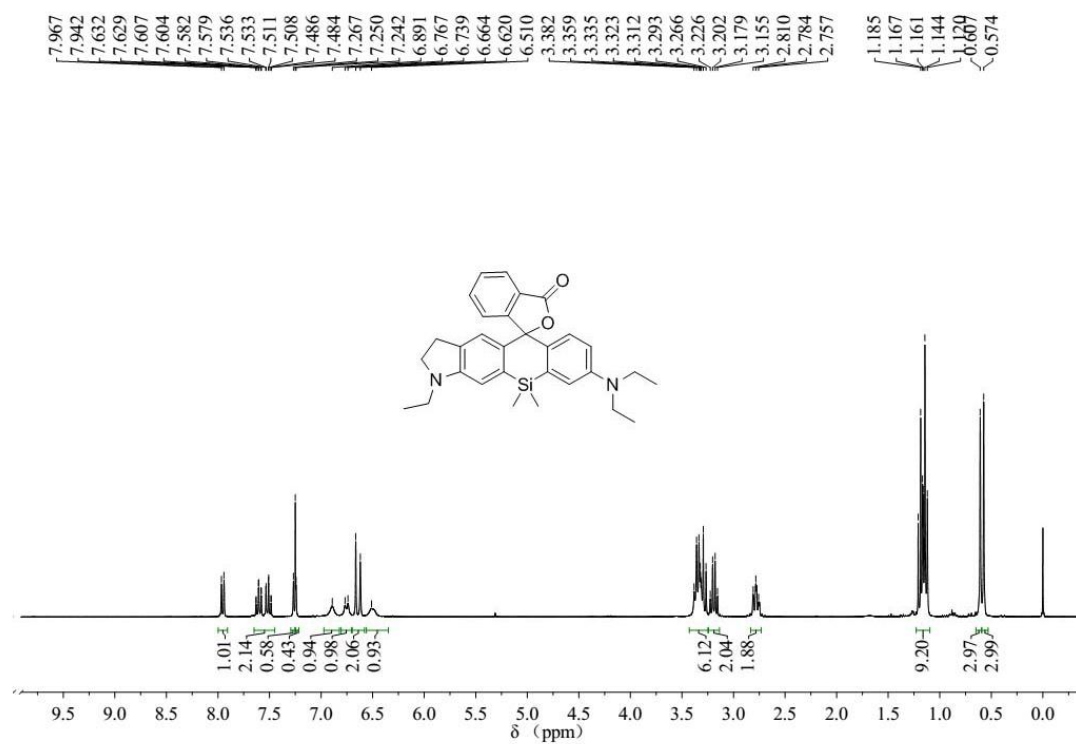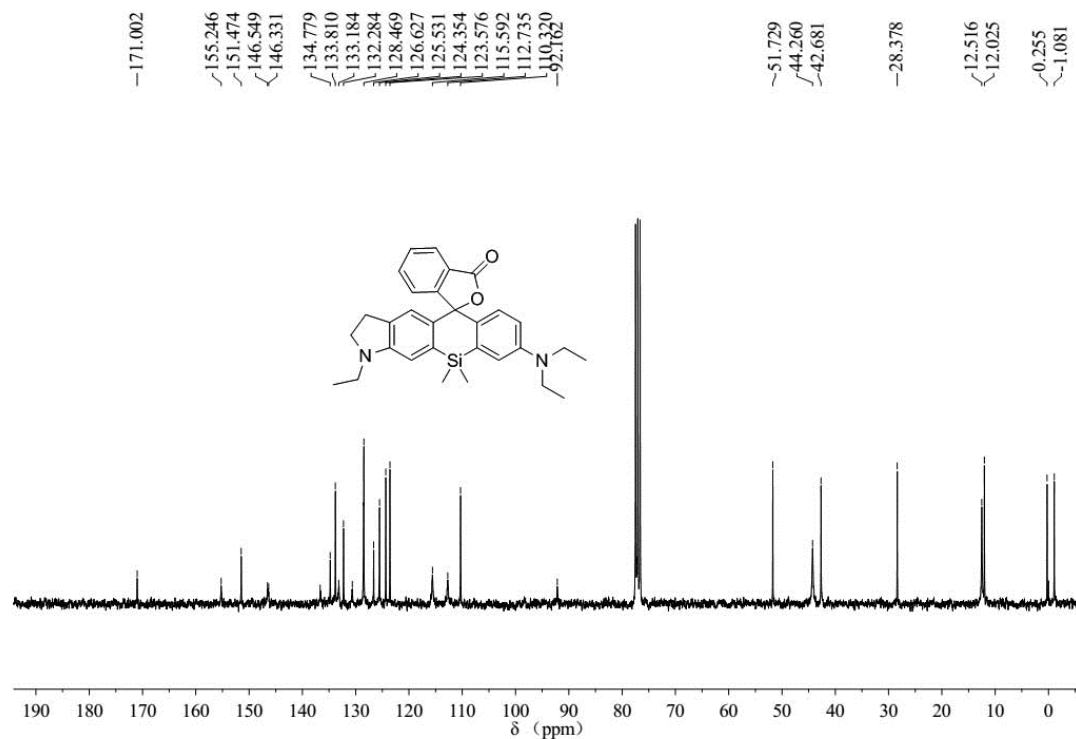

## Qualitative Analysis Report

|                        |                  |               |                      |
|------------------------|------------------|---------------|----------------------|
| Data Filename          | WBG-SIRB-2.d     | Sample Name   | WBG-SIRB-2           |
| Sample Type            | Sample           | Position      | P1-B6                |
| Instrument Name        | Instrument 1     | User Name     |                      |
| Acq Method             | TEST-POS-01-WL.m | Acquired Time | 4/8/2014 11:10:01 AM |
| IRM Calibration Status | Success          | DA Method     | L.m                  |
| Comment                |                  |               |                      |

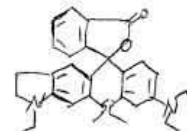

### User Spectra

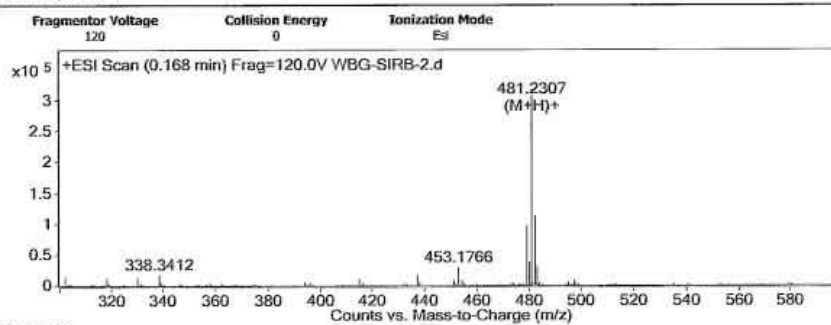

#### Peak List

| m/z      | z | Abund  | Formula          | Ion    |
|----------|---|--------|------------------|--------|
| 121.0509 |   | 92170  |                  |        |
| 271.1875 |   | 54260  |                  |        |
| 274.2739 |   | 29918  |                  |        |
| 437.1941 |   | 17338  |                  |        |
| 453.1766 |   | 29929  |                  |        |
| 479.2157 | 1 | 97400  |                  |        |
| 480.2181 | 1 | 37569  |                  |        |
| 481.2307 | 1 | 316926 | C30 H33 N2 O2 Si | (M+H)+ |
| 482.2342 | 1 | 113162 | C30 H33 N2 O2 Si | (M+H)+ |
| 483.2341 | 1 | 30400  | C30 H33 N2 O2 Si | (M+H)+ |

#### Formula Calculator Element Limits

| Element | Min | Max |
|---------|-----|-----|
| C       | 3   | 200 |
| H       | 0   | 300 |
| O       | 1   | 3   |
| N       | 1   | 3   |
| Si      | 1   | 2   |

#### Formula Calculator Results

| Formula          | Best | Mass     | Tgt Mass | Diff (ppm) | Ion Species      | Score |
|------------------|------|----------|----------|------------|------------------|-------|
| C30 H32 N2 O2 Si | TRUE | 480.2235 | 480.2233 | -0.41      | C30 H33 N2 O2 Si | 98.75 |

--- End Of Report ---

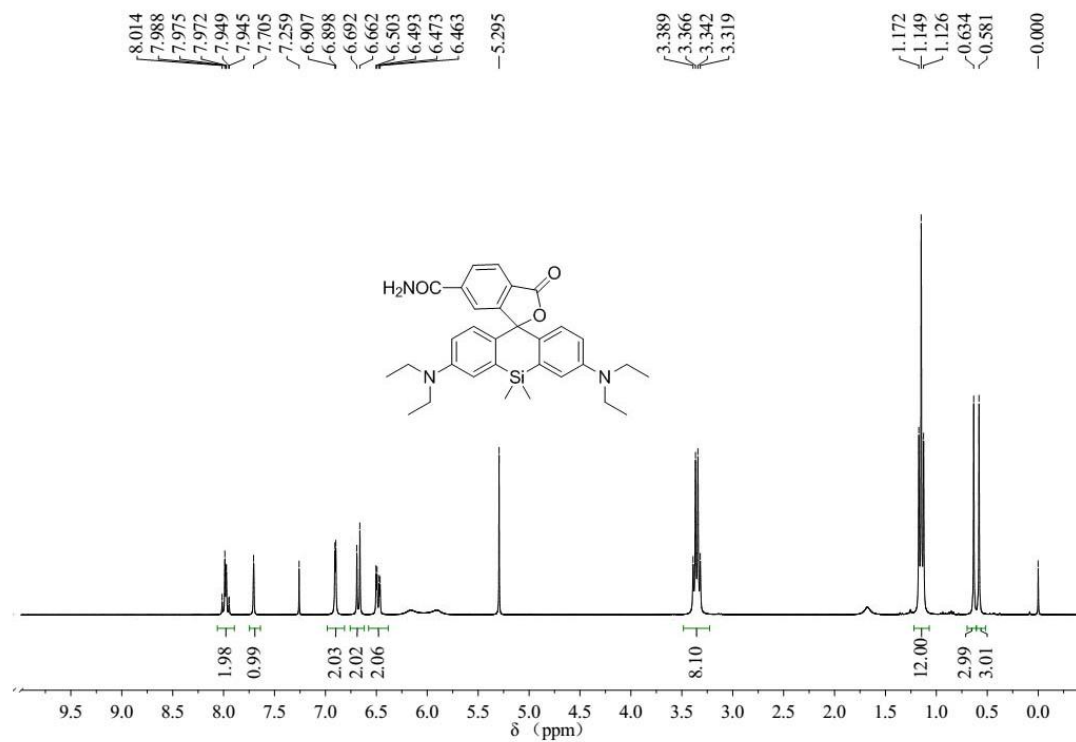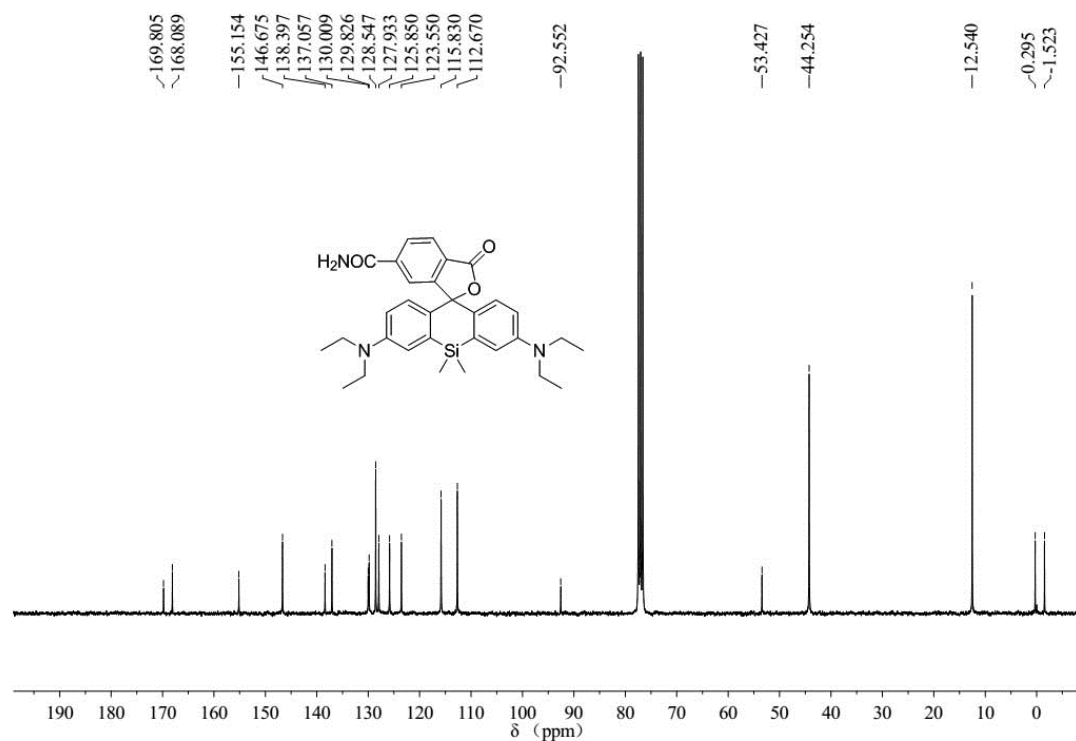

## Qualitative Analysis Report

|                        |                   |               |                      |
|------------------------|-------------------|---------------|----------------------|
| Data Filename          | WBG-SIRB-CONH2.d  | Sample Name   | WBG-SIRB-CONH2       |
| Sample Type            | Sample            | Position      | P1-B8                |
| Instrument Name        | Instrument 1      | User Name     |                      |
| Acq Method             | TEST-POS-01-VIL.m | Acquired Time | 4/8/2014 11:13:16 AM |
| IRM Calibration Status | Success           | DA Method     | 1.m                  |
| Comment                |                   |               |                      |

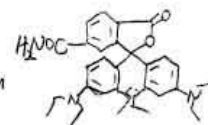

### User Spectra

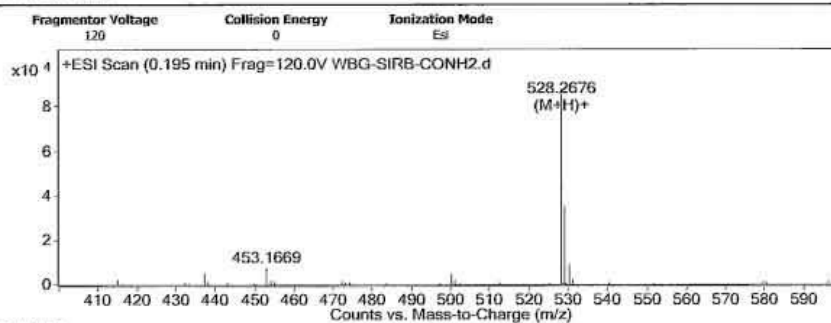

### Peak List

| m/z      | z | Abund  | Formula          | Ion    |
|----------|---|--------|------------------|--------|
| 84.9597  |   | 20573  |                  |        |
| 121.0509 | 1 | 121494 |                  |        |
| 125.9857 |   | 40802  |                  |        |
| 158.0026 |   | 14769  |                  |        |
| 264.637  | 2 | 103477 |                  |        |
| 265.1382 | 2 | 41750  |                  |        |
| 271.187  |   | 32286  |                  |        |
| 528.2676 | 1 | 87712  | C31 H38 N3 O3 Si | (M+H)+ |
| 529.2693 | 1 | 35167  | C31 H38 N3 O3 Si | (M+H)+ |
| 922.0098 |   | 18389  |                  |        |

### Formula Calculator Element Limits

| Element | Min | Max |
|---------|-----|-----|
| C       | 3   | 200 |
| H       | 0   | 300 |
| O       | 1   | 3   |
| N       | 1   | 3   |
| Si      | 1   | 2   |

### Formula Calculator Results

| Formula          | Best | Mass     | Tgt Mass | Diff (ppm) | Ion Species      | Score |
|------------------|------|----------|----------|------------|------------------|-------|
| C31 H37 N3 O3 Si | TRUE | 527.2603 | 527.2604 | 0.29       | C31 H38 N3 O3 Si | 98.99 |

--- End Of Report ---

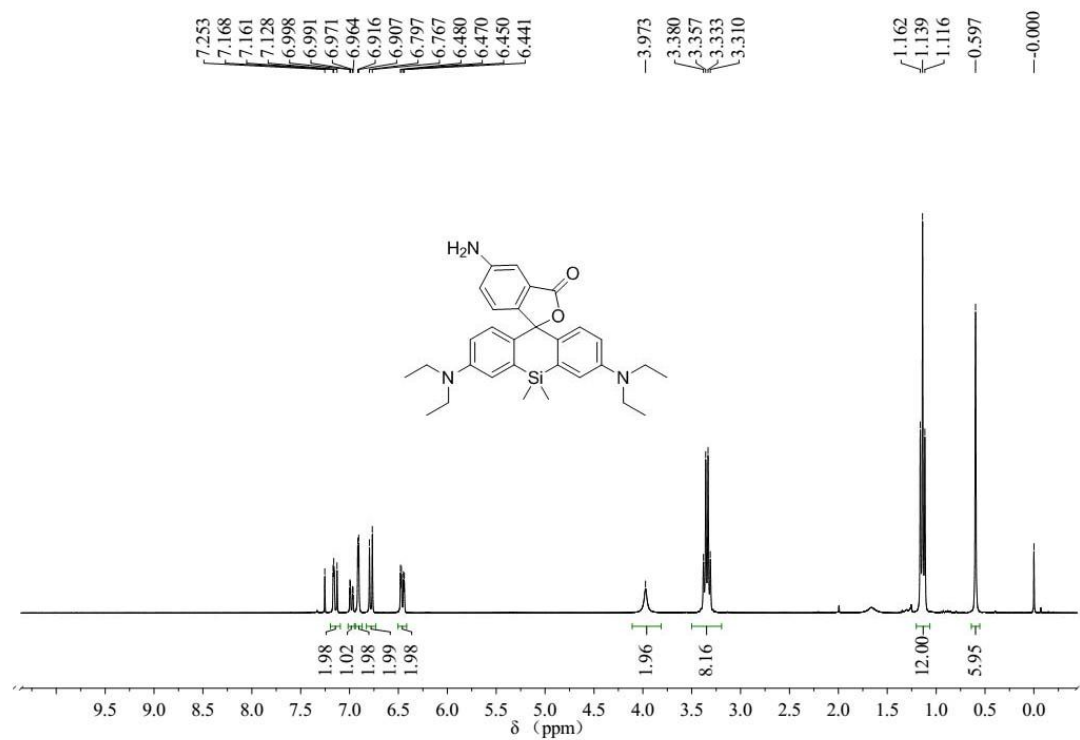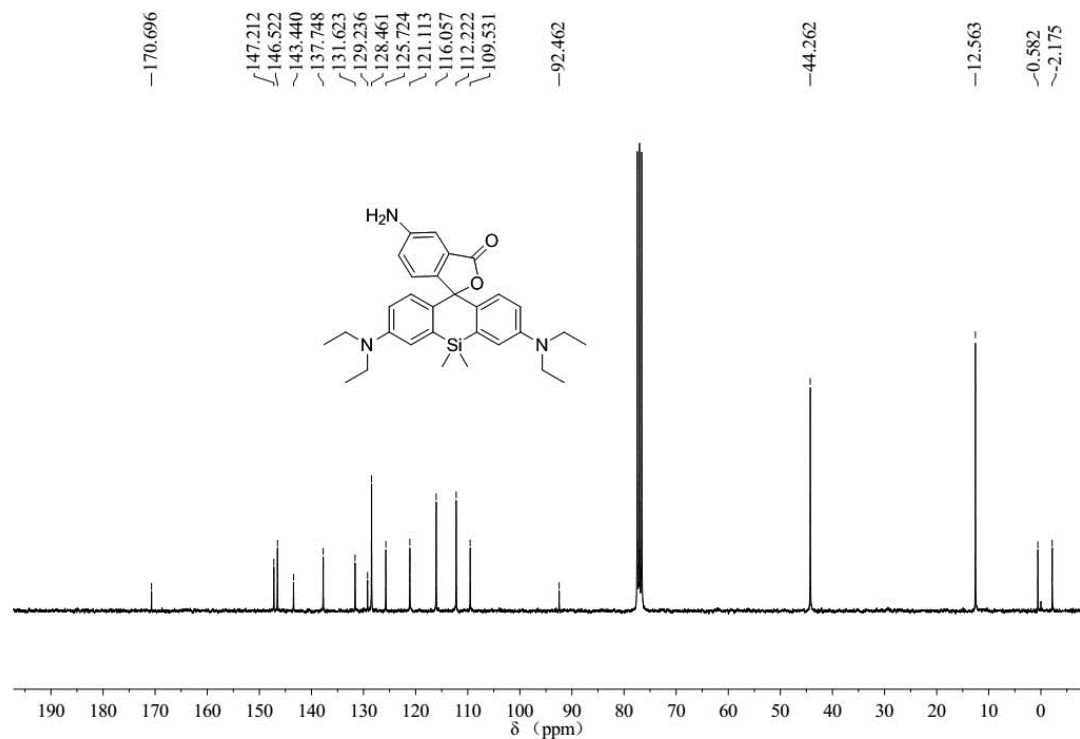

## Qualitative Analysis Report

|                        |                  |               |                      |
|------------------------|------------------|---------------|----------------------|
| Data Filename          | SIR-NH2.d        | Sample Name   | SIR-NH2              |
| Sample Type            | Sample           | Position      | P1-B6                |
| Instrument Name        | Instrument 1     | User Name     |                      |
| Acq Method             | TEST-POS-01-WL.m | Acquired Time | 3/12/2014 5:07:06 PM |
| IRM Calibration Status | Success          | DA Method     | Default.m            |
| Comment                |                  |               |                      |

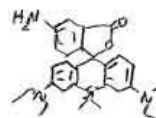

### User Spectra

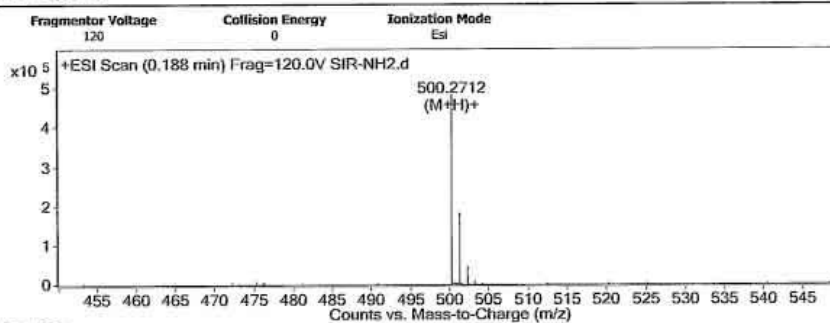

### Peak List

| m/z      | z | Abund   | Formula          | Ion    |
|----------|---|---------|------------------|--------|
| 121.0509 |   | 154346  |                  |        |
| 250.6402 | 2 | 272646  |                  |        |
| 251.1416 | 2 | 94769   |                  |        |
| 282.279  |   | 69039   |                  |        |
| 338.34   | 1 | 1181564 |                  |        |
| 339.3454 | 1 | 261759  |                  |        |
| 500.2712 | 1 | 497652  | C30 H38 N3 O2 Si | (M+H)+ |
| 501.2755 | 1 | 183907  | C30 H38 N3 O2 Si | (M+H)+ |

### Formula Calculator Element Limits

| Element | Min | Max |
|---------|-----|-----|
| C       | 0   | 60  |
| H       | 0   | 120 |
| O       | 0   | 30  |
| Cl      | 0   | 5   |
| N       | 0   | 5   |
| Si      | 0   | 1   |

### Formula Calculator Results

| Formula          | Best | Mass    | Tgt Mass | Diff (ppm) | Ion Species      | Score |
|------------------|------|---------|----------|------------|------------------|-------|
| C30 H37 N3 O2 Si | TRUE | 499.264 | 499.2655 | 2.97       | C30 H38 N3 O2 Si | 92.64 |

— End Of Report —

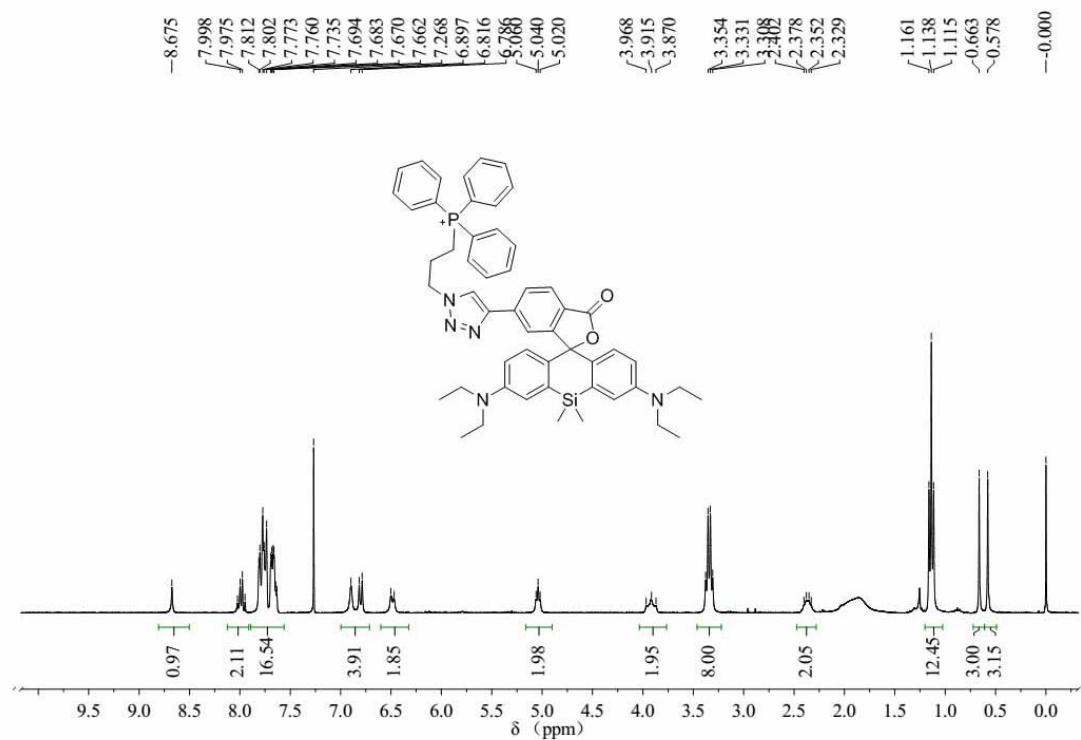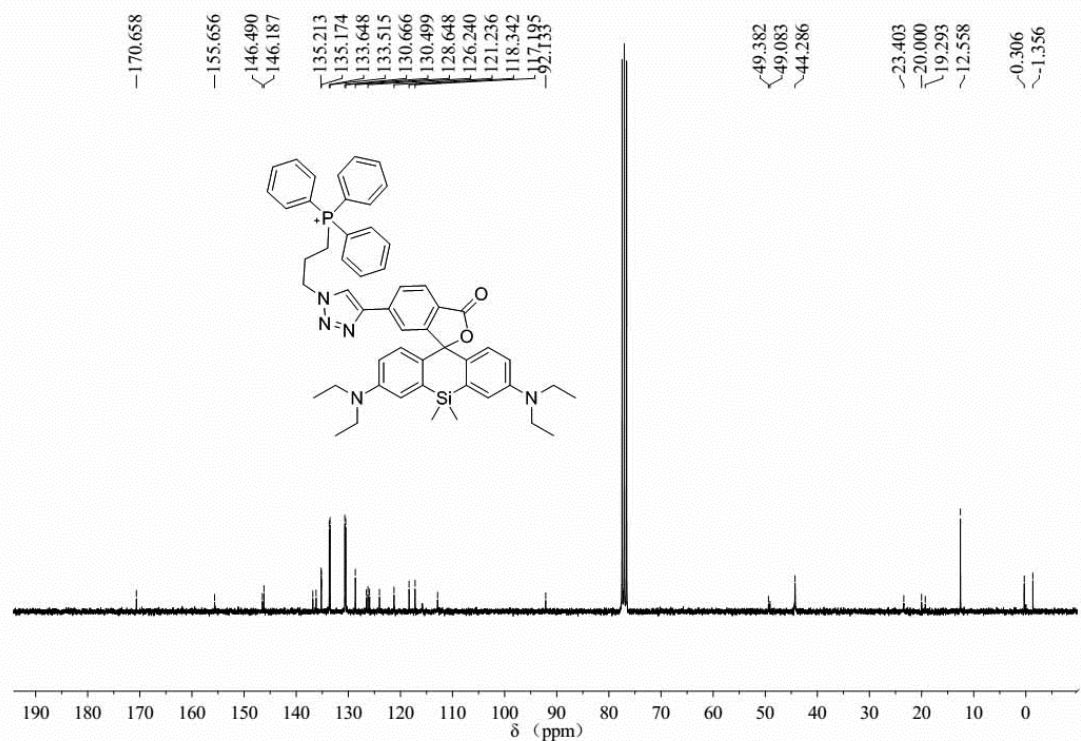

## Qualitative Analysis Report

|                               |                    |                      |                      |
|-------------------------------|--------------------|----------------------|----------------------|
| <b>Data Filename</b>          | WT-WBG-SIRB-MITO.d | <b>Sample Name</b>   | WT-WBG-SIRB-MITO     |
| <b>Sample Type</b>            | Sample             | <b>Position</b>      | P1-E3                |
| <b>Instrument Name</b>        | Instrument 1       | <b>User Name</b>     |                      |
| <b>Acq Method</b>             | TEST-POS-01-WL.m   | <b>Acquired Time</b> | 6/12/2014 9:52:23 AM |
| <b>IRM Calibration Status</b> | Success            | <b>DA Method</b>     | ERROR11.m            |
| <b>Comment</b>                |                    |                      |                      |

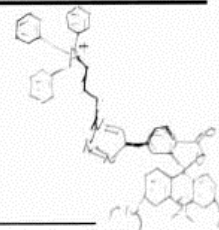

### User Spectra

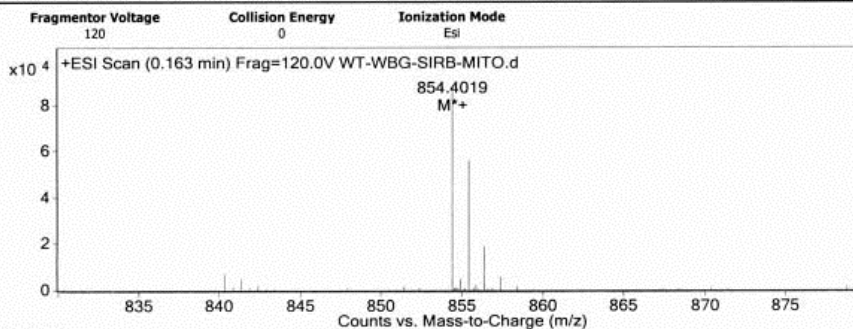

### Peak List

| m/z      | z | Abund  |
|----------|---|--------|
| 274.2743 | 1 | 236824 |
| 282.2788 | 1 | 365886 |
| 285.472  |   | 346339 |
| 285.8077 |   | 180527 |
| 318.3002 |   | 116111 |
| 326.1486 | 2 | 203641 |
| 413.6897 | 2 | 166960 |
| 427.7034 | 2 | 492645 |
| 428.2063 | 2 | 317553 |
| 651.2888 | 1 | 189232 |

### Formula Calculator Element Limits

| Element | Min | Max |
|---------|-----|-----|
| C       | 0   | 100 |
| H       | 0   | 100 |
| O       | 0   | 5   |
| N       | 0   | 5   |
| P       | 0   | 1   |
| Si      | 0   | 1   |

### Formula Calculator Results

| Formula            | Best | Mass     | Tgt Mass | Diff (ppm) | Ion Species        | Score |
|--------------------|------|----------|----------|------------|--------------------|-------|
| C53 H57 N5 O2 P Si | TRUE | 854.4024 | 854.4019 | -0.51      | C53 H57 N5 O2 P Si | 98.77 |

--- End Of Report ---



## X-Ray Crystallography.

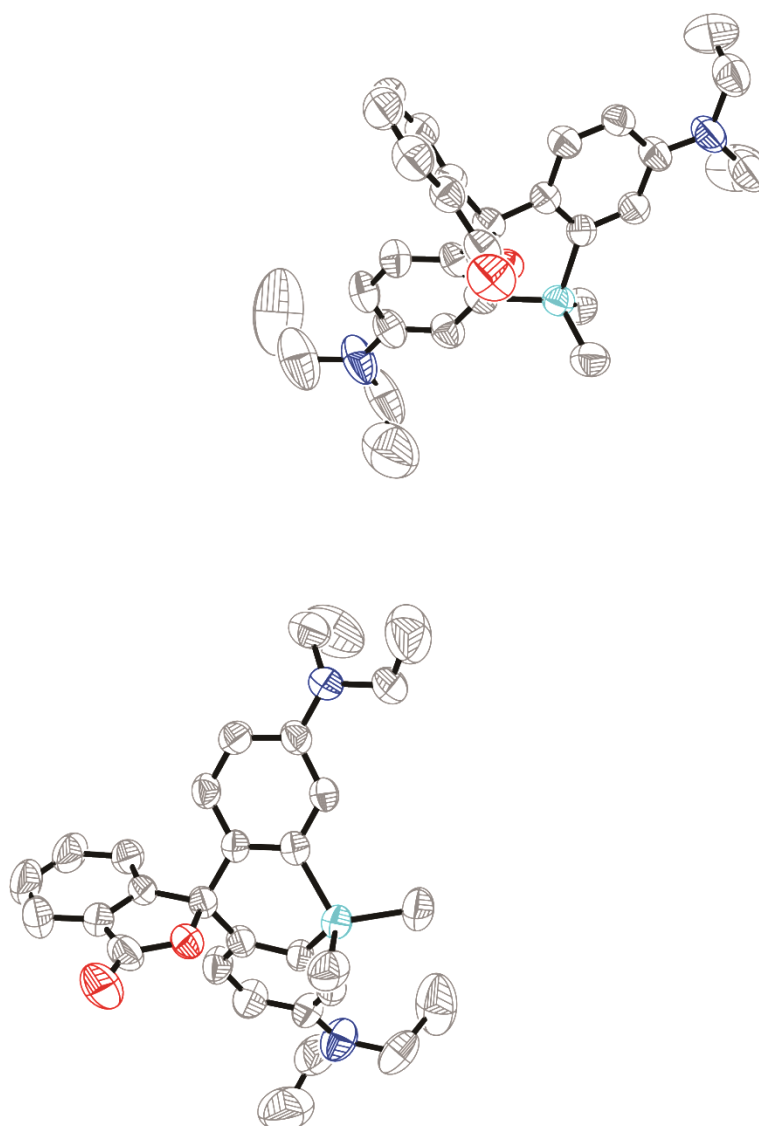

**Fig. S1** Single-crystal structure of **SiRB**.

**Table S2** Crystal data and structure refinement for a30614a.

|                                   |                                                                                                                  |
|-----------------------------------|------------------------------------------------------------------------------------------------------------------|
| Identification code               | a30614a                                                                                                          |
| Empirical formula                 | C <sub>30</sub> H <sub>36</sub> N <sub>2</sub> O <sub>2</sub> Si                                                 |
| Formula weight                    | 3877.58                                                                                                          |
| Temperature                       | 153(2) K                                                                                                         |
| Wavelength                        | 0.71073 Å                                                                                                        |
| Crystal system, space group       | Orthorhombic, Pna2(1)                                                                                            |
| Unit cell dimensions              | a = 22.481(5) Å $\alpha = 90^\circ$<br>b = 12.174(2) Å $\beta = 90^\circ$<br>c = 20.069(4) Å $\gamma = 90^\circ$ |
| Volume                            | 5492.6(19) Å <sup>3</sup>                                                                                        |
| Z, Calculated density             | 1, 1.172 Mg/m <sup>3</sup>                                                                                       |
| Absorption coefficient            | 0.114 mm <sup>-1</sup>                                                                                           |
| F(000)                            | 2080                                                                                                             |
| Crystal size                      | 0.40 x 0.28 x 0.14 mm                                                                                            |
| Theta range for data collection   | 1.81 to 25.02 °                                                                                                  |
| Limiting indices                  | -20<=h<=26, -14<=k<=14, -23<=l<=23                                                                               |
| Reflections collected / unique    | 21808 / 9615 [R <sub>(int)</sub> = 0.0526]                                                                       |
| Completeness to $\theta = 25.02$  | 99.8 %                                                                                                           |
| Absorption correction             | none                                                                                                             |
| Max. and min. transmission        | 0.9842 and 0.9559                                                                                                |
| Refinement method                 | Full-matrix least-squares on F <sup>2</sup>                                                                      |
| Data / restraints / parameters    | 9615 / 1 / 644                                                                                                   |
| Goodness-of-fit on F <sup>2</sup> | 0.849                                                                                                            |
| Final R indices [I>2sigma(I)]     | R <sub>1</sub> = 0.0456, wR <sub>2</sub> = 0.0837                                                                |
| R indices (all data)              | R <sub>1</sub> = 0.0896, wR <sub>2</sub> = 0.0938                                                                |
| Largest diff. peak and hole       | 0.269 and -0.206 e. Å <sup>-3</sup>                                                                              |

## Absorption and Fluorescence.

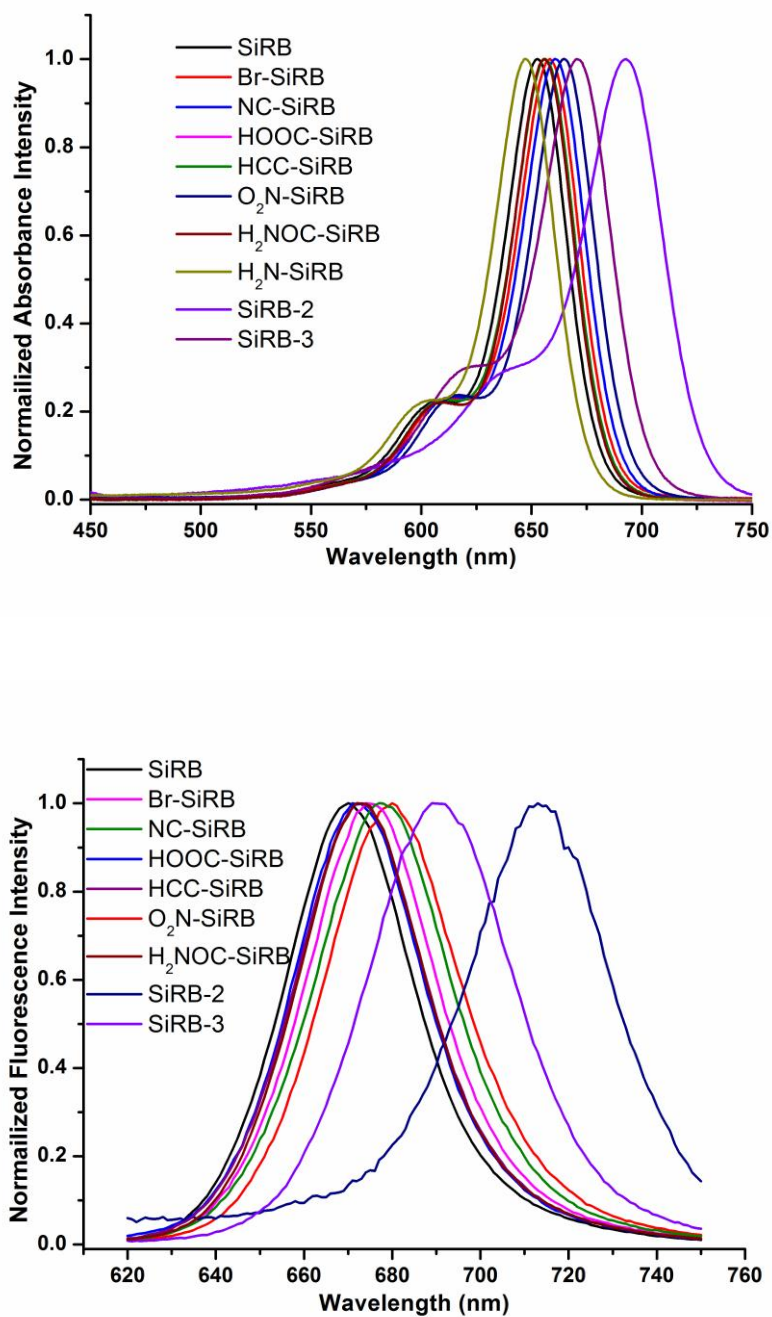

**Fig. S2** Absorbance (top) and fluorescence (bottom) spectra of **SiRBs**. Spectra were obtained in EtOH solution containing 0.1 mM HCl.

**Tables S3.** Spectral properties of **SiRBs** in EtOH solution containing 0.1 mM HCl.

| <b>SiRBs</b>                       | $\lambda_{\text{maxabs}}$<br>(nm) | $\epsilon_{\text{max}}$<br>( $\text{cm}^{-1}\text{M}^{-1}$ ) | $\lambda_{\text{fluor}}$<br>(nm) | $\Phi_f$<br>(%) |
|------------------------------------|-----------------------------------|--------------------------------------------------------------|----------------------------------|-----------------|
| <b>SiRB</b>                        | 652                               | 160000                                                       | 670                              | 17              |
| <b>SiRB-3</b>                      | 670                               | 120000                                                       | 689                              | 8               |
| <b>SiRB-2</b>                      | 693                               | 110000                                                       | 713                              | 2.3             |
| <b>Br-SiRB</b>                     | 658                               | 140000                                                       | 674                              | 14              |
| <b>NO<sub>2</sub>-SiRB</b>         | 664                               | 160000                                                       | 680                              | 9               |
| <b>CN-SiRB</b>                     | 661                               | 140000                                                       | 677                              | 12              |
| <b>COOH-SiRB</b>                   | 656                               | 92000                                                        | 671                              | 16              |
| <b>HC<math>\equiv</math>C-SiRB</b> | 656                               | 140000                                                       | 672                              | 16              |
| <b>NH<sub>2</sub>-SiRB</b>         | 647                               | 140000                                                       | 667                              | 0.4             |
| <b>NH<sub>2</sub>OC-SiRB</b>       | 656                               | 160000                                                       | 672                              | 15              |

## Fluorescence Imaging

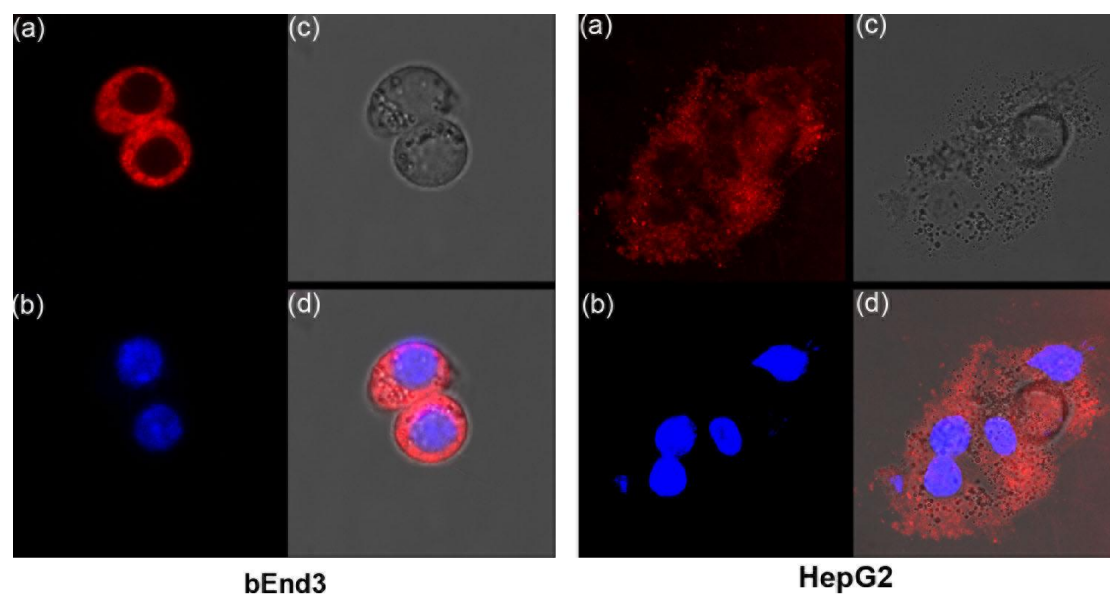

**Fig. S3** Fluorescence images of bEnd3 (left) and HepG2 (right) cells co-stained with 10.0  $\mu$ M **SiRB** and DAPI. (a) Fluorescence microscopic images from **SiRB** (b) Fluorescence microscopic images from DAPI. (c) Microscopic images. (d) Merged fluorescence microscopic images.

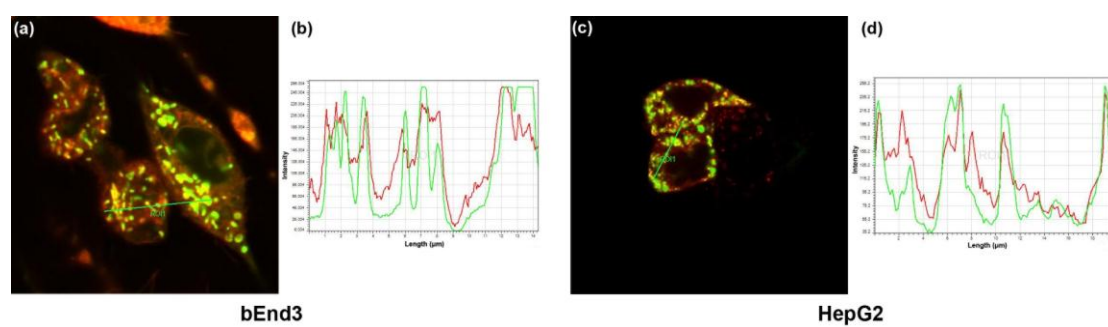

**Fig. S4** Fluorescence images of bEnd3 (left) and HepG2 (right) cells co-stained with 10.0  $\mu$ M **Mito-SiRB** and 50 nM Rhodamine 123. (a) and (c) Merged fluorescence microscopic images. (b) and (d) Intensity profiles of region of interest cross the cells.

## References

- S1. G. Sheldrick, *Acta Crystallogr., Sect. A*, 2008, **64**, 112.
- S2. K. Rurack and M. Spieles, *Anal. Chem.*, 2011, **83**, 1232.
- S3. D. Frahm, M. Fischer, F. Hoffmann and M. Fröba, *Inorg. Chem.*, 2011, **50**, 11055.
- S4. T. Matsuda, Y. Yamaguchi, M. Shigeno, S. Sato and M. Murakami, *Chem. Commun.*, 2011, **47**, 8697.
- S5. R. Mirabdolbaghi and T. Dudding, *Org. Lett.*, 2012, **14**, 3748.
- S6. J. Y. Hwang, R. R. Attia, F. Zhu, L. Yang, A. Lemoff, C. Jeffries, M. C. Connelly and R. K. Guy, *J. Med. Chem.*, 2012, **55**, 2301.
- S7. I. C. S. Cardoso, A. L. Amorim, C. Queirós, S. C. Lopes, P. Gameiro, B. de Castro, M. Rangel and A. M. G. Silva, *Eur. J. Org. Chem.*, 2012, **2012**, 5810.
